# Supplementary material for: Evaluation of a complex integrated, cross-sectoral psycho-oncological care program (isPO): a mixed-methods study protocol
Source: PubMed Central journal article supplement — BMJ Open. 2020 Mar 9;10(3):e034141. doi: 10.1136/bmjopen-2019-034141 (PMC7064131; doi:10.1136/bmjopen-2019-034141), 2020-03-09
Supplement: bmjopen-2019-034141.draft_revisions.pdf [file bmjopen-2019-034141.draft_revisions.pdf]

# BMJ Open

BMJ Open is committed to open peer review. As part of this commitment we make the peer review history of every article we publish publicly available.

When an article is published we post the peer reviewers' comments and the authors' responses online. We also post the versions of the paper that were used during peer review. These are the versions that the peer review comments apply to.

The versions of the paper that follow are the versions that were submitted during the peer review process. They are not the versions of record or the final published versions. They should not be cited or distributed as the published version of this manuscript.

BMJ Open is an open access journal and the full, final, typeset and author-corrected version of record of the manuscript is available on our site with no access controls, subscription charges or pay-per-view fees (<http://bmjopen.bmj.com>).

If you have any questions on BMJ Open's open peer review process please email [info.bmjopen@bmj.com](mailto:info.bmjopen@bmj.com)

# BMJ Open

## Evaluation of a complex integrated, cross-sectoral psycho-oncological care program (isPO): a mixed-methods study protocol

|                               |                                                                                                                                                                                                                                                                                                                                                                                                                                                                                                                                                                                                                                                                                                                                                                                                                                                                                                                                                                                                                                                                                                                                                                                                                                                                                                                                                                                                    |
|-------------------------------|----------------------------------------------------------------------------------------------------------------------------------------------------------------------------------------------------------------------------------------------------------------------------------------------------------------------------------------------------------------------------------------------------------------------------------------------------------------------------------------------------------------------------------------------------------------------------------------------------------------------------------------------------------------------------------------------------------------------------------------------------------------------------------------------------------------------------------------------------------------------------------------------------------------------------------------------------------------------------------------------------------------------------------------------------------------------------------------------------------------------------------------------------------------------------------------------------------------------------------------------------------------------------------------------------------------------------------------------------------------------------------------------------|
| Journal:                      | <i>BMJ Open</i>                                                                                                                                                                                                                                                                                                                                                                                                                                                                                                                                                                                                                                                                                                                                                                                                                                                                                                                                                                                                                                                                                                                                                                                                                                                                                                                                                                                    |
| Manuscript ID                 | bmjopen-2019-034141                                                                                                                                                                                                                                                                                                                                                                                                                                                                                                                                                                                                                                                                                                                                                                                                                                                                                                                                                                                                                                                                                                                                                                                                                                                                                                                                                                                |
| Article Type:                 | Protocol                                                                                                                                                                                                                                                                                                                                                                                                                                                                                                                                                                                                                                                                                                                                                                                                                                                                                                                                                                                                                                                                                                                                                                                                                                                                                                                                                                                           |
| Date Submitted by the Author: | 09-Sep-2019                                                                                                                                                                                                                                                                                                                                                                                                                                                                                                                                                                                                                                                                                                                                                                                                                                                                                                                                                                                                                                                                                                                                                                                                                                                                                                                                                                                        |
| Complete List of Authors:     | Jenniches, Imke; University of Cologne, Institute of Medical Sociology, Health Services Research and Rehabilitation Science (IMVR)<br>Lemmen, Clarissa; University Hospital Cologne<br>Cwik, Jan; University of Cologne, Department of Psychology<br>Kusch, Michael; University Hospital Cologne, Department of Internal Medicine<br>Labouvie, Hildegard; University Hospital Cologne, Department of Internal Medicine<br>Scholten, Nadine; Univ Cologne, IMVR - Institute for Medical Sociology, Health Services Research and Rehabilitation Science<br>Gerlach, Alexander; University of Cologne, Department of Psychology<br>Stock, Stephanie; Universitat zu Koln Institut fur Gesundheitsokonomie und Klinische Epidemiologie<br>Samel, Christina; University Hospital of Cologne, Institute of Health Economics and Clinical Epidemiology<br>Hagemeier, Anna; University of Cologne, Institute of Medical Statistics and Computational Biology<br>Hellmich, Martin; University of Cologne, 3) Institute of Medical Statistics and Computational Biology (IMSB)<br>Haas, Peter; University of Applied Sciences and Arts Dortmund, Department of Computer Science (Medical Informatics)<br>Hallek, Michael; University Hospital Cologne, Department of Internal Medicine<br>Pfaff, Holger; University of Cologne, Cologne, Germany,<br>Dresen, Antje; University of Cologne, Medical Sociology |
| Keywords:                     | study protocol, health services research, psycho-oncology, mixed-methods, implementation, process evaluation                                                                                                                                                                                                                                                                                                                                                                                                                                                                                                                                                                                                                                                                                                                                                                                                                                                                                                                                                                                                                                                                                                                                                                                                                                                                                       |
|                               |                                                                                                                                                                                                                                                                                                                                                                                                                                                                                                                                                                                                                                                                                                                                                                                                                                                                                                                                                                                                                                                                                                                                                                                                                                                                                                                                                                                                    |

SCHOLARONE™  
Manuscripts

# Evaluation of a complex integrated, cross-sectoral psycho-oncological care program (isPO): a mixed-methods study protocol

Imke Jenniches<sup>1</sup>, Clarissa Lemmen<sup>3</sup>, Jan C. Cwik<sup>2</sup>, Michael Kusch<sup>6</sup>, Hildegard Labouvie<sup>6</sup>, Nadine Scholten<sup>1</sup>, Alexander L. Gerlach<sup>2</sup>, Stephanie Stock<sup>3</sup>, Christina Samel<sup>4</sup>, Anna Hagemeyer<sup>4</sup>, Martin Hellmich<sup>4</sup>, Peter Haas<sup>5</sup>, Michael Hallek<sup>6</sup>, Holger Pfaff<sup>1</sup>, Antje Dresen<sup>1\*</sup>

## Author affiliations

<sup>1</sup>Institute of Medical Sociology, Health Services Research, and Rehabilitation Science (IMVR), Faculty of Human Sciences and Faculty of Medicine, University of Cologne, Germany

<sup>2</sup>Department of Psychology, University of Cologne, Germany

<sup>3</sup>Institute for Health Economics and Clinical Epidemiology, University Hospital Cologne, Cologne, Germany

<sup>4</sup>Institute of Medical Statistics and Computational Biology, Medical Faculty, University of Cologne, Germany

<sup>5</sup>Department of Computer Science (Medical Informatics), University of Applied Sciences and Arts, Dortmund, Germany

<sup>6</sup>Department I of Internal Medicine; Center for Integrated Oncology Cologne-Bonn, University Hospital Cologne, Cologne, Germany

\*corresponding author

Dr. Antje Dresen

Eupener Straße 129

50933 Cologne

Germany

antje.dresen@uk-koeln.de

Tel: 0049 221 478 97168

**Keywords:** study protocol, health services research, psycho-oncology, mixed-methods, data linkage, implementation, process evaluation, regression discontinuity design

Word Count: 4.374 words

## Abstract

**Introduction:** International standards of care require the complete integration of psycho-oncological care into biomedical cancer treatment. The structured integrated, cross-sectoral psycho-oncological program "isPO" is aiming to ensure a provision of care in inpatient and outpatient settings according to a stepped-care approach. Up to now, psycho-oncological care is missing regulated and standardized processes to demonstrate the effectiveness. This study protocol describes the process and outcome evaluation that is conducted, along with the isPO study. The program evaluation is aiming to proof effectiveness, explain potential discrepancies between expected and observed outcomes. Additionally, provide insight into the implementation process, as well as contextual factors that might promote or inhibit the dissemination and implementation of the stepped care program will be gained. In addition to these measures, a cost consequence analysis will provide further evidence aimed at integrating psycho-oncological care into primary health care.

**Methods and Analysis:** The evaluation concept is based on a tripartite strategy consisting of a prospective, formative and summative evaluation. To capture all determinants a concurrent mixed-method design is applied comprising qualitative (interviews and focus groups) and quantitative (standardized questionnaires) surveys of patients and health care providers. In addition, analysis of the psycho-oncological care data (isPO care data) and statutory health insurance claims data will be conducted. Primary and secondary data will complement one another (data linkage) to obtain a more comprehensive picture of the effectiveness and implementation of the complex intervention within the isPO study.

**Ethics and Dissemination:** The study has been approved by the ethics committee of the Medical Faculty of the University of Cologne. For all collected data, the relevant national and European data protection regulations will be considered. All personal identifiers (e.g. name, date of birth) will be pseudonymised. Dissemination strategies include annual reports as well as quality workshops for the organizations, the presentation of results in publications and on conferences, and public relations.

## Registration Details:

The study has been registered in the German Clinical Trials Register (No. DRKS00015326).

## Strengths and Limitations

- The mixed-methods approach (qualitative and quantitative data) and the linking of primary and secondary data sources allow a multidimensional view on the quality and effectiveness of the psycho-oncological care program.
- Results of the process evaluation are directly used to continuously improve the care program.
- Regression discontinuity design (RDD) allows estimation of the average treatment effect since a Randomised controlled trial (RCT) is not possible for ethical reasons in this specific setting
- The cost-consequence is of limited generalizability but is able to estimate a broader range of costs and consequences and help decision makers structure their consideration of the different consequences of a decision
- Risk of selection bias due to the quasi-experimental study design, in which patients are assigned to care-level groups on the basis of a cut-off value (validity of cut-off value will be analysed alongside with the primary outcome to ensure group equivalence)

## Introduction

There were 14.1 million new cancer cases and 32.6 million people living with cancer (within 5 years) in 2012 worldwide [1]. In Germany, recent epidemiology studies showed an annual incidence of about 480.000 cancer cases in 2014 [2]. A cancer diagnosis is often associated with emotional distress as well as symptoms of anxiety and depression [3–5]. Psychological well-being is increasingly seen as an important component of cancer care. In line with this, psycho-oncology is an area of multi-disciplinary interest that deals with the psychological, social, behavioural, and ethical aspects of cancer [6, 7]. This subspecialty addresses the two major psychological dimensions of cancer: the psychological responses of patients to cancer at all stages of the disease, and that of their families and caretakers; and the psychological, behavioural and social factors that may influence the disease process. Overall psycho-oncology aims to enable cancer patients to cope with their illness and actively contribute to their medical treatment and follow-up care [6–8]. Although the German national cancer plan [9] as well national and international guidelines and standards of care [10–12] call for the full integration of psycho-oncology into biomedical cancer treatment, essential structures, processes and financing for psycho-oncological treatment is not yet established [13–16]. As funding is not uniformly regulated in Germany, the affordability of psycho-oncological treatment is a major challenge for private and statutory health insurances (SHI) [14–16].

1  
2  
3 Systematic reviews and meta-analyses show that different psychotherapeutic and  
4 psychosocial intervention are associated with small-to-medium effects on quality of life and  
5 emotional distress [17–20]. Effect size was positively correlated with high levels of distress at  
6 the starting point and the duration of intervention [17]. However, most of the studies are  
7 restricted to female breast-cancer patients [17, 21] and do not comprise a pre-defined  
8 screening process of cancer patients to deliver need-based psycho-oncological care in a  
9 stepped-care manner.  
10

11  
12 Therefore, the integrated cross-sectional psycho-oncology (isPO) program aims to develop,  
13 implement and evaluate a new stepped-care psychosocial and psychotherapeutic care  
14 program for adult newly diagnosed cancer patients. The German version of the widely  
15 accepted “hospital anxiety and depression scale” (HADS) [11, 22, 23] and two self-developed  
16 and validated questionnaires (publication in preparation; [24, 25]), will be used as screening  
17 instruments to assess individual patient needs, i.e. the assignment to a specific care level,  
18 and as an outcome measure. The RDD as a regression-based quasi-experimental approach  
19 is used to measure efficacy, reduction of anxiety and depression after 12 months of  
20 treatment via HADS-questionnaire. Secondary outcomes are the quality of the care program,  
21 including feasibility, patient satisfaction and perceived benefit.  
22  
23

24  
25 Because an effectiveness study is limited in its ability to provide information regarding  
26 whether an intervention is successful (including the implementation process) [26] and what  
27 are relevant costs and type of costs, the isPO study is accompanied by a complex process  
28 evaluation and a health economic analysis. This external evaluation aims to gain guidance  
29 on the quality and appropriateness of the psycho-oncological care program and on  
30 implementation and dissemination strategies for complex health intervention. The evaluation  
31 will focus on implementation outcomes, such as acceptance, feasibility, appropriateness,  
32 effectiveness and costs [27], as well as patient reported outcomes, such as quality of life and  
33 satisfaction with care.  
34  
35

36  
37 In order to cover all relevant aspects, two frameworks are combined for the analysis: The  
38 Medical Research Council (MRC)-Framework for the evaluation of complex interventions [28]  
39 and the Consolidated Framework for Implementation Research (CFIR) [29]. The MRC  
40 guidance defines the function of process evaluation at different stages of development,  
41 evaluation and implementation of complex intervention and was therefore used to design the  
42 tripartite evaluation design, consisting of a prospective, formative and summative part. This  
43 framework gives equal attention to the implementation itself, the mechanism of impact  
44 (participant’s responses and mechanisms of change) and the influence of contextual factors  
45 that may act as barriers and facilitators to implementation, dissemination and intervention  
46 effects [28, 30]. For the systematic identification and evaluation of relevant context factors  
47  
48  
49  
50  
51  
52  
53  
54  
55  
56  
57  
58  
59  
60

1  
2  
3 and potential barriers and facilitators, constructs related to an effective implementation of the  
4 CFIR are used. This framework captures the complexity of the implementation across the  
5 key aspects and provides a theoretically based coverage of the internal and external  
6 settings, the characteristics of the intervention and the people involved, and the process  
7 itself. This meta-theoretical framework can be used across all phases of implementation (pre-  
8 , during, and post-implementation) [29, 31], and has been shown to be effective for guiding  
9 successful implementation across numerous health domains, such as weight management  
10 and cancer screening [31, 32]. Overall, both frameworks advocate a multilevel contextual  
11 perspective on the implementation and evaluation of interventions. The objective in using  
12 these two frameworks was to ensure that we took into account and addressed all the  
13 important factors based on well-validated constructs that are essential for the evaluation of a  
14 new health program and its effective implementation.  
15  
16  
17  
18  
19  
20  
21  
22  
23

#### 24 Main research questions

- 26 • Does the structured 12-month psycho-oncological care program reduce anxiety  
27 and depression in cancer patients?
- 28 • How are quality of care, structures and processes perceived by patients and  
29 employees, and what is the experience of psychotherapists, social workers, onco-  
30 guides, nurses and physicians implementing isPO across settings?
- 31 • Which contextual factors and which baseline implementation constructs (CFIR)  
32 predict implementation success for each health-care network?
- 33 • What effects does the isPO program have on costs and use of SHI health  
34 services in comparison to standard care?
- 35 • Do the structures and contents of the health care program provide a suitable basis  
36 for their integration in the standard health care system?
- 37  
38  
39  
40  
41  
42  
43

#### 44 Secondary research questions:

- 46 • How do sociodemographic factors, comorbidities, the cancer entity or the form of  
47 medical treatment influence the effectiveness of psycho-oncological care?
- 48 • Which sociodemographic and health care-related risk factors predict the extent of  
49 psychological stress reactions on the initial diagnosis of cancer?
- 50  
51  
52  
53  
54  
55  
56  
57  
58  
59  
60

## Methods and Analysis

### Study Design

The project isPO aims to develop, implement, and evaluate a new cross-sectoral form of psycho-oncological care. The study receives funding from the German Federal Joint Committee (G-BA), a public legal entity comprising the four leading umbrella organizations of the self-governing German healthcare system. During the 4-year project (October 2017 – September 2021), up to 3.484 outpatients and inpatients of full legal age ( $\geq 18$  years) with a primary diagnosis of cancer (ICD-10-GM C00 – C97) will be included in the isPO program. Patients will be assigned to either the control group (HADS  $\leq 14$ ; care level 1 and 2) or the intervention group (HADS  $\geq 15$ ; care level 3) depending on the anxiety and depression level upon enrollment in the study. The control group will receive support of an onco-guide (level 1) or psychosocial support (level 2), whereas the intervention group receives psychotherapeutic treatment (level 3). Patients with a starting HADS  $\pm 2$  around the cut-off will be evaluated for the treatment effect. This is based on the assumption that the distribution around the threshold is at random [33]. The treatment effect (primary outcome) is analysed using the RDD for patients with initial HADS values between 13 and 16 [34]. The RDD represents a valid alternative to RCT studies to estimate treatment effects [35]. Anticipated treatment effects (reduction of HADS after 12 months of psycho-oncological treatment) are expected to lead to a discontinuity of the linear regression at the cut-off. In the course of the effectiveness measure the preset cut-off value of the HADS will also be validated. In addition, further self-developed screening instruments are used to assess individual psychosocial risk factors and the cognitive-emotional response to cancer diagnosis and to assign patients to a certain level of care (level 1 or 2). Publication of the validation of these screening instruments is in preparation [24, 25].

In order to ensure the full integration of psycho-oncological treatment into clinical care, the psycho-oncological care is provided under supervision of the treating physician. The physicians therefore recommend their cancer patients for the isPO program. Depending on the needed level of care either onco-guides, trained former cancer patients (level 1), social worker (level 2) or psychotherapists (level 3) will take over the treatment. Recruitment and care of the patients started in January 2019 and will continue until March 2021.<sup>1</sup>

The development and implementation of the isPO program are based on the model of program theory for health promotion programs [36]. The process and outcome evaluation, carried out alongside the isPO care program, applies a mixed-methods design based on several data sources, including health insurance claims data, clinical psychotherapeutic and

---

<sup>1</sup> Publication of the detailed description of the psycho-oncological stepped-care concept of the isPO project is in preparation.



1  
2  
3 psychosocial data (isPO care data) as well as qualitative and quantitative surveys of patients  
4 and health care providers. Both quantitative and qualitative data are collected in parallel and  
5 analysed separately. The results are then compared. In addition, there is an increasing need  
6 to assess the economic impact of psycho-oncology services on cancer in order to provide the  
7 necessary evidence to guide decision-making [37]. Not only the efficacy, but also the cost-  
8 effectiveness of an intervention will be decisive, whether it will be transferred into standard  
9 care. Therefore, a health economic evaluation of isPO is necessary and also requested by  
10 the SHI. A cost-consequences analysis from the point of view of the German health  
11 insurance funds using SHI claims data is planned. This analysis examines costs and  
12 consequences without attempting to isolate a single consequence or aggregate  
13 consequences into a single measure [38]. The health economic evaluation is financed by the  
14 University Hospital Cologne's own funds. Furthermore, fidelity, quality and feasibility will be  
15 monitored during the entire project using the clinical psychotherapeutic and psychosocial  
16 documentation (isPO care data), quarterly quality reviews of each network and quarterly  
17 inter- and cross-network quality workshops.

### 28 29 Setting

30  
31 The isPO study is conducted in four health-care networks in North Rhine-Westphalia  
32 (Germany) each consisting of one hospital (rural, urban or university) with two or more  
33 certified oncological centres in collaboration with several resident physicians. All four sites  
34 were selected based on predetermined criteria that are representative for the different health  
35 care providers in rural and urban regions.<sup>2</sup> For the process and outcome evaluation all  
36 participating patients (approx. 3.400) and health care providers (approx. 200), including  
37 nurses, psychotherapists, social workers, and physicians, will be included in the quantitative  
38 study. For qualitative studies participants will be selected based on the principal of  
39 “purposeful sampling”, a technique widely used in qualitative research for the identification  
40 and selection of information-rich cases for the most effective use of limited resources [39].  
41 This involves identifying and selecting individuals or groups of individuals that are especially  
42 knowledgeable about or experienced with a phenomenon of interest [39–41]. The potential  
43 selection bias caused by this sampling method is offset by the mixed-method design, which  
44 increases the credibility of results.

53  
54  
55  
56  
57  
58  
59  
60  

---

<sup>2</sup> Publication of the detailed description of the psycho-oncological stepped-care concept of the isPO project including the inclusion criteria for the networks is in preparation.

## Patient and public involvement

The House of the Cancer Patient Support Associations of Germany (association of ten cancer support groups) as well as the German Cancer Society North Rhine-Westphalia are also applicants of the study. Both groups have been working on the concept, design and implementation since the planning of the study and give advice to the scientists regarding the outcome measures and research questions. They assess and represent the patient's perspective and will provide up-to-date information about the project status for the public on their homepages and events. In addition, all questionnaires were pre-tested with at least three former cancer patients to ensure that the questionnaires met the needs of a patient in content, length and comprehensibility. The questionnaires were adapted as best as possible based on the patients' comments.

## Process and outcome evaluation design

### *Prospective, formative and summative evaluation*

Due to the high complexity of the isPO project, a multifaceted evaluation design is applied. For the current study, the MRC framework by Moore *et al.* [28] for process evaluation of complex interventions in combination with the CFIR constructs seems to be suitable. Therefore, a tripartite evaluation design will be applied comprising a prospective, formative, and summative evaluation. Prospective and formative the concept, implementation and appropriateness will be evaluated on an ex ante and in-process basis. All results will be reported and promptly used to optimize the care program and the implementation process. Finally, primary and secondary outcomes, as well as the transferability, will be evaluated summatively. By using this multidimensional mixed-method design, it will be possible to account for the different contextual factors influencing the implementation as well as patient-related and patient-reported outcomes. Among others we will report implementation outcomes, such as acceptability, appropriateness, feasibility, fidelity, efficiency, effectiveness, and satisfaction [27]. In addition to patient-related factors, such as age, comorbidities or sociodemographic factors, variables such as structural conditions, readiness, and attitude towards change, knowledge-based and experience-based variables can play a role on the care provider's side. The planned data collection and the corresponding data sources as well as research questions are listed in Table 1.

### *Quantitative data collection and analysis*

Within the scope of the study patients and health care provider, such as physicians, nurses, psychologists, social worker, and onco-guides, are questioned at two points in time by means of a written (postal) survey. The aim of these surveys and the subsequent quantitative

1  
2  
3 analysis is to determine the appropriateness and feasibility of the stepped-care program.  
4 Essential aspects of the patient questionnaire are satisfaction with the psycho-oncological  
5 care, other social support, and quality of life. The provider questionnaire focuses on the  
6 attitude towards the new psycho-oncological program, intervention characteristics, and  
7 personal as well as organizational barriers and facilitators, such as attitude towards change  
8 and corporate culture [29].  
9  
10  
11  
12

13 In order to archive the highest possible response rate, the survey is conducted according to  
14 Dillmann's "Total Design Method" [42]. To create the questionnaires and to import paper-  
15 based survey data, the data capturing software Teleform® is used. Validated scales are  
16 analysed according to the coding manual. Psychometric analyses of factorial validity and  
17 reliability are carried out on the scales developed in-house.  
18  
19  
20  
21  
22

### 23 *Qualitative data collection and analysis*

24  
25 To enable patients to describe their experiences with the intervention, approximately 30  
26 patients will be interviewed. In addition to the quantitative surveys, this qualitative analysis  
27 provides a deeper insight into the perceptions and opinions of the respondents. In addition,  
28 this method enables the identification of further factors that influence patient acceptance and  
29 perceived benefit. To meet the needs of vulnerable patients, such as cancer patients,  
30 respondents can choose to participate in a single interview or focus group. The number of  
31 interviews will be adapted with respect to the saturation point. Participants will be  
32 approached through the data trustee of the project, who is the only one (other than the health  
33 care provider) with access to patient contact addresses for the data linkage and patient  
34 surveys. Through the targeted selection of interviewees, we take relevant criteria such as  
35 age, gender, assigned level of care, and region into account. In addition, we will conduct  
36 approximately eight focus groups (six to eight persons each) with health care providers and  
37 interviews with each network coordinator (quality management representatives of the clinics),  
38 leading physicians and each leading psycho-oncologist of the four health-care networks (four  
39 persons each). Interviews and focus groups will be guided by scientific rules, audio recorded,  
40 transcribed, pseudonymised, and analysed based on content [43] or documentary analyses  
41 [44].  
42  
43  
44  
45  
46  
47  
48  
49  
50  
51  
52

53 Overall, these qualitative analyses will provide in-depth understanding of the mechanisms of  
54 action, how context affects implementation or why those who carry out or receive the  
55 intervention engage as planned or not. It gives a greater insight into barriers and facilitators  
56 of the implementation process at the different sites as well as into the perception of different  
57 professions. In this way, we will collect data from all participants on key aspects of the  
58 process and combine these results with in-depth data from smaller samples.  
59  
60

1  
2  
3 *Administrative data analysis: statutory health insurance and clinical data – data linkage*  
4

5 In order to gain a greater insight into the impact of acute cancer treatment, health, and  
6 medical history and comorbidities on the effectiveness of psycho-oncological care and the  
7 changing use of health care services during the care program, the following data sets will be  
8 analysed:  
9  
10

- 11 1.) Statutory health insurance claims data of all recruited patients insured with one of the  
12 four largest German health insurance funds, covering around 70 % of the statutory  
13 insured patients in Germany  
14
- 15 2.) Clinical psychological and psychosocial data (isPO care data) from each recruited  
16 patient in each network (hospital)  
17
- 18 3.) Cancer registry data from each recruited patient in each network (hospital)  
19

20  
21  
22 Statutory health insurance claims data will be analysed at each care level within the  
23 framework of the stepped-care program and at regional level (each network). In addition to  
24 patient characteristics, this hierarchical data set contains further information at the provider  
25 level. Data at the patient level includes age, gender, insurance status, inpatient and  
26 outpatient treatment, diagnoses, and drug prescriptions. At the provider level, it is possible to  
27 consider the attending physicians and hospitals at regional and medical specialist level.  
28 Hierarchical multi-level analysis allows us to consider the clustering of data at different levels  
29 in order to identify relevant influencing factors.  
30  
31  
32

33  
34  
35 Clinical psychological and psychosocial data (isPO care data) of each recruited patient will  
36 provide information about the delivered care in each network and at each care level. This  
37 enables the isPO program's range, fidelity and dose to be analysed.  
38  
39

40  
41 A third data set (cancer registry data), containing the differentiated medical diagnosis and  
42 biomedical treatment, will provide additional information on the medical status of the patients  
43 included. This dataset will include additional clinical measures such as the tumour state,  
44 surgical procedures or the type of chemotherapy or radiotherapy. The analyses will provide  
45 further insights into the influence of biomedical treatment or the severity of the disease on the  
46 effectiveness of psycho-oncological treatment.  
47  
48  
49

50  
51 All analyses follow the guidelines and recommendations of Good Practice of Secondary Data  
52 Analysis [45]. As the data are not collected for scientific reasons but for reimbursement,  
53 resulting impact on the validity of the data is taken into account.  
54

55  
56 By linking the administrative data sets with the survey results, the perceived benefits and  
57 quality of life as well as sociodemographic data can be linked with the more general health  
58 status and the use of other health services. It also enables the identification of predictors of  
59 increased stress response after cancer diagnosis. In addition, multi-level analyses will take  
60

1  
2  
3 into account the health context in each network (hospital) and the relationship between the  
4 context and health care outcomes [46].  
5  
6  
7

### 8 Health economic analysis

9  
10 A health economic analysis is conducted in form of a cost-consequences analysis from  
11 German SHI perspective. This economic evaluation is based on SHI claims data. The  
12 advantage of using routine data for evaluation is that cross-sectoral costs and the use of  
13 health services are taken into account. The result can help the decision-makers to assess  
14 and compare the costs and use of health services between isPO patients and patients in  
15 standard care. The intervention group (isPO patient) is selected based on the isPO inclusion  
16 criteria, legal age ( $\geq 18$  years) and a primary diagnosis of cancer (ICD-10-GM C00 – C97).  
17 However, due to the delayed availability of SHI claims data, not all isPO patients can be  
18 considered in the health economic analysis.  
19  
20  
21  
22  
23  
24

25 IsPO patients (intervention group) will be compared to patients in standard care (control  
26 group). The control group is generated based on SHI claims data using propensity score  
27 matching [47–49]. Each isPO patient will be assigned to up to five patients from standard  
28 health care according to predefined criteria. Propensity score matching is a method to  
29 balance covariates observed in non-randomized studies between subjects in the control and  
30 intervention groups. The matching is carried out by the participating statutory health  
31 insurance funds, so that the data of the control group can then be transferred and analysed  
32 anonymously. Costs and use of inpatient and outpatient treatments, medicines, remedies  
33 and aids as well as periods of inability to work will be analysed. The economic evaluation  
34 examines differences in costs, use of health services and hospitalisation during 12 months of  
35 treatment in isPO compared to standard care. Costs and consequences of different  
36 outcomes are listed separately in a disaggregated format and the results are presented using  
37 descriptive statistics.  
38  
39  
40  
41  
42  
43  
44  
45  
46  
47

### 48 **Ethics and Dissemination**

#### 49 Ethical considerations

50  
51 The study was reviewed and has received ethics approval from the ethics committee of the  
52 Medical Faculty University hospital of Cologne and has been registered within the German  
53 Clinical Trial register (No. DRKS00015326). Up to the point of submission, there was still no  
54 ethics vote available for the health economic analysis. Review of the health economics  
55 analysis by the ethical commission is currently in progress. For all analysed data relevant  
56 national and international data protection regulations will be respected. In accordance with  
57  
58  
59  
60

1  
2  
3 national requirements and the principles of the Declaration of Helsinki, written informed  
4 consent will be obtained from all participants prior to enrolment and all study participants can  
5 revoke their consent without any negative consequences. The focus groups, as well as the  
6 interviews will be performed solely by trained researchers, trying to minimize the  
7 psychological burden of the patients as well as the health care providers. The survey will be  
8 performed pseudonymously. Personal identifiers will be only recorded to manage the  
9 responses to the questionnaire. Confidentiality will be maintained at all levels of data  
10 management. Cognitive pre-test on the postal survey will be performed before dissemination  
11 in order to facilitate the answering of the questionnaire and reduce mental stress. For the  
12 data analysis, all personal names are removed and all data records used are sufficiently  
13 coarsened to ensure pseudonymisation, especially with regard to data linkage. A complex  
14 approach to data protection, involving the use of three different pseudonyms (for the different  
15 data transmission channels) and the establishment of a project data trustee, who is not  
16 involved in data analysis, ensures the highest possible level of data protection in line with the  
17 requirements of the European General Data Protection Regulation (GDPR).  
18  
19  
20  
21  
22  
23  
24  
25  
26  
27  
28

### 29 Dissemination

31 The isPO project partners have agreed on publication guidelines, a publication strategy and  
32 a publication plan. The publication strategy consists of the dissemination in scientific peer-  
33 reviewed journals and presentations at national and international academic conferences.  
34 Moreover, there is a strategy to ensure dissemination in popular science forums, such as  
35 research gate, and in public media. Professional exchange and patient participation will be a  
36 prominent task within in the project to gain the necessary dissemination and sustainability of  
37 the research findings. Therefore, a homepage was created to spread up to date news on the  
38 project progress. In addition, the House of the Cancer Patient Support Associations of  
39 Germany (association of ten cancer support groups) as well as the German Cancer Society  
40 North Rhine-Westphalia will provide up-to-date information on their homepages and events.  
41  
42  
43  
44  
45  
46  
47

48 The publication plan will evolve over time but includes the following planned scientific  
49 activities:

- 51 • Six Ph.D. theses at four different scientific institutes of the university of cologne
  - 52 • About twenty scientific articles in different peer-reviewed journals
  - 53 • Local seminars at the study sites
  - 54 • Information events of cancer self-help groups and the Cancer Society North Rhine-  
55 Westphalia
- 56  
57  
58  
59  
60

- Special sessions planned at the 19. annual meeting of the PSO (Psycho-Oncology Committee of the German cancer Society) in 2020 and the German congress of Health Care Research (DKVF) 2020
- Presentations at national and international conferences
- Popular science presentations in national media and healthcare magazines

## Conclusion

IsPO aims to reduce symptoms of anxiety and depression in cancer inpatients and outpatients, to improve their psychosocial situation and to promote self-help. Different sectors of the German health care system and a wide range of scientific institutes cooperate to implement and evaluate a cross-sectoral psycho-oncological care program more responsive to patients' needs. The evaluation of the new care program will provide important evidence-based results from the perspective of patients and practitioners for cross-sectoral psychosocial and psycho-oncological care of patients with initial cancer diagnosis and opens the way for a transfer of the care program into standard care. Cost-consequence analyses examine whether the care concept also favors the effective use of existing resources.

From a methodological point of view, the proposed project is highly innovative. It takes into account all relevant perspectives, enables new needs-based health care, has a prospective, multicentre and controlled design and offers a linkage of primary and secondary data from different health insurance funds for efficacy, effectiveness and cost analyses.

The aim of the project is to meet the requirements that make it possible to implement this new form of care in the standard care system in Germany. The care program will combine approaches of cancer self-help (care level 1), psychosocial cancer counselling (care level 2) and psycho-oncological psychotherapy (care level 3) in a uniform care concept, operationalize them and integrate them into oncological care. It will provide a care management to regulate interdisciplinary and cross-sectoral cooperation in health care. Results of the process and outcome evaluation will provide insight into the quality and appropriateness of the care concept as well as the implementation process of a complex health innovation. In the long-term, the program could also be suitable for the care of patients other than those suffering from oncological diseases.

A particular strength of the study is the participation of several statutory health insurance funds and a possible linkage of primary and secondary data. For the first time in Germany, this study thus offers an evidence-based basis for decision-making on the integration of a new demand-oriented psycho-oncological care structure into standard health care.

### **Contribution**

MH, MK, MHe, ALG, HP, NS, PH and STS are applicants of the funded study. IJ, AD, NS, JCC, CL, MHe, CS, HL and MK designed the study. IJ drafted manuscript and incorporated the revisions between authors. MHe, AH, CS, IJ and AD drafted and finalized the concept of data protection for all patient related research data and data transfers involved as part of the ethics application. The final manuscript has been critically revised and approved by all authors.

### **Funding statement**

This study is funded by the Innovation Fund of the Federal Joint Committee, the G-BA (01NVF17022). The study has passed a peer-review selection process.

### **Competing interests**

The authors declare no conflicts of interest.



## REFERENCES

- 1 Torre LA, Bray F, Siegel RL, et al. Global cancer statistics, 2012. *CA Cancer J Clin* 2015;65(2):87–108.
- 2 Robert-Koch-Institut. Zentrum für Krebsregisterdaten. Krebs in Deutschland für 2013/2014 2017(11. Ausgabe).  
[https://www.krebsdaten.de/Krebs/DE/Content/Publikationen/Krebs\\_in\\_Deutschland/kid\\_2017/krebs\\_in\\_deutschland\\_2017.pdf;jsessionid=F2403ECE5FDAC900A7D8783650BDCAF8.1\\_cid390?\\_\\_blob=publicationFile](https://www.krebsdaten.de/Krebs/DE/Content/Publikationen/Krebs_in_Deutschland/kid_2017/krebs_in_deutschland_2017.pdf;jsessionid=F2403ECE5FDAC900A7D8783650BDCAF8.1_cid390?__blob=publicationFile).
- 3 Linden W, Vodermaier A, Mackenzie R, et al. Anxiety and depression after cancer diagnosis: prevalence rates by cancer type, gender, and age. *J Affect Disord*. 2012;141(2-3):343–51.
- 4 Zabora J, BrintzenhofeSzoc K, Curbow B, et al. The prevalence of psychological distress by cancer site. *Psychooncology* 2001;10(19-28).
- 5 Bussmann S, Vaganian L, Kusch M, et al. Angst und Emotionsregulation bei Krebspatienten. *Psychotherapeut* 2018;63(3):194-203.
- 6 Holland JC, ed. *Psycho-oncology*, 3rd edn. New York: Oxford University Press 2015.
- 7 Kusch M, Labouvie H, Hein-Nau B. *Klinische Psychoonkologie*. Berlin/Heidelberg: Springer 2013.
- 8 Weis J, Schumacher A, Blettner G, et al. Psychoonkologie. *Onkologe* 2007;13(2):185–94.
- 9 Bundesministerium für Gesundheit (BMG). Nationaler Krebsplan: Handlungsfelder, Ziele, Umsetzungsempfehlungen und Ergebnisse 2012.  
[https://www.bundesgesundheitsministerium.de/fileadmin/Dateien/5\\_Publikationen/Praevention/Broschueren/Broschuere\\_Nationaler\\_Krebsplan.pdf](https://www.bundesgesundheitsministerium.de/fileadmin/Dateien/5_Publikationen/Praevention/Broschueren/Broschuere_Nationaler_Krebsplan.pdf).
- 10 Institute of Medicine (IOM). *Cancer care for the whole patient: Meeting psychosocial health needs*. Washington, DC: National Academies Press 2008.
- 11 Leitlinienprogramm Onkologie (DKG, DKH, AWMF). *Psychoonkologische Diagnostik, Beratung und Behandlung von erwachsenen Krebspatienten: Langfassung Version 1.1* 2014.
- 12 Holland JC, Watson M, Dunn J. The IPOS new international Standard of Quality Cancer Care: integrating the psychosocial domain into routine care. *Psychooncology* 2011;20(7):677–80.
- 13 Jacobsen PB, Lee M. Integrating Psychosocial Care Into Routine Cancer Care. *Cancer Control* 2015;22(4):442–49.
- 14 Singer S, Dieng S, Wesselmann S. Psycho-oncological care in certified cancer centres - a nationwide analysis in Germany. *Psychooncology* 2013;22(6):1435–37.
- 15 Singer S, Hornemann B, Bruns G, et al. Organisation der psychoonkologischen Versorgung. *Forum* 2016;31(2):124–29.
- 16 Heckl U, Singer S, Wickert M, et al. Aktuelle Versorgungsstrukturen in der Psychoonkologie. *Nervenheilkunde* 2011;30(03):124–30.
- 17 Faller H, Schuler M, Richard M, et al. Effects of psycho-oncologic interventions on emotional distress and quality of life in adult patients with cancer: Systematic review and meta-analysis. *J Clin Oncol* 2013;31(6):782–93.
- 18 Osborn RL, Demoncada AC, Feuerstein M. Psychosocial interventions for depression, anxiety, and quality of life in cancer survivors: meta-analyses. *Int J Psychiatry Med* 2006;36(1):13–34.

- 19 Sheard T, Maguire P. The effect of psychological interventions on anxiety and depression in cancer patients: results of two meta-analyses. *Br J Cancer* 1999;80(11):1170–80.
- 20 Zimmermann T, Heinrichs N, Baucom DH. "Does one size fit all?" moderators in psychosocial interventions for breast cancer patients: a meta-analysis. *Ann Behav Med* 2007;34(3):225–39.
- 21 Kerr A, Ross E, Jacques G, et al. The sociology of cancer: A decade of research. *Sociol Health Illn* 2018;40(3):552–76.
- 22 Ibbotson T, Maguire P, Selby P, et al. Screening for anxiety and depression in cancer patients: The effects of disease and treatment. *Eur J Cancer* 1994;30A(1):37–40.
- 23 Jacobsen PB, Donovan KA, Trask PC, et al. Screening for psychologic distress in ambulatory cancer patients. *Cancer* 2005;103(7):1494–502.
- 24 Kusch M, Cwik JC, Bussmann S, et al. Fragebogen zur kognitiv-emotionalen Auseinandersetzung mit Krebs (KEA-K). *Köln: CIO Köln* 2017.
- 25 Cwik JC, Bussmann S, Vaganian L, et al. Fragebogen zu Psychosozialen Risiken (PSR). *Köln: Universität zu Köln* 2018.
- 26 Oakley A, Strange V, Bonell C, et al. Process evaluation in randomised controlled trials of complex interventions. *BMJ* 2006;332(7538):413–16.
- 27 Proctor E, Silmere H, Raghavan R, et al. Outcomes for implementation research: Conceptual distinctions, measurement challenges, and research agenda. *Adm Policy Ment Health* 2011;38(2):65–76.
- 28 Moore GF, Audrey S, Barker M, et al. Process evaluation of complex interventions: Medical Research Council guidance. *BMJ* 2015;350:h1258.
- 29 Damschroder LJ, Aron DC, Keith RE, et al. Fostering implementation of health services research findings into practice: A consolidated framework for advancing implementation science. *Implement Sci* 2009;4:50.
- 30 Craig P, Dieppe P, Macintyre S, et al. Developing and evaluating complex interventions: The new Medical Research Council guidance. *BMJ* 2008;337:a1655.
- 31 Damschroder LJ, Lowery JC. Evaluation of a large-scale weight management program using the consolidated framework for implementation research (CFIR). *Implement Sci* 2013;8:51.
- 32 Liang S, Kegler MC, Cotter M, et al. Integrating evidence-based practices for increasing cancer screenings in safety net health systems: a multiple case study using the Consolidated Framework for Implementation Research. *Implement Sci* 2016;11:109.
- 33 Venkataramani AS, Bor J, Jena AB. Regression discontinuity designs in healthcare research. *BMJ* 2016;352:i1216.
- 34 Moscoe E, Bor J, Bärnighausen T. Regression discontinuity designs are underutilized in medicine, epidemiology, and public health: A review of current and best practice. *J Clin Epidemiol* 2015;68(2):122–33.
- 35 Maas IL, Nolte S, Walter OB, et al. The regression discontinuity design showed to be a valid alternative to a randomized controlled trial for estimating treatment effects. *J Clin Epidemiol* 2017;82:94–102.
- 36 Issel LM. Health program planning and evaluation: A practical, systematic approach for community health, 3rd edn. Burlington Mass.: Jones and Bartlett Learning 2014.
- 37 Tuffaha H, El-Saifi N, Chambers S, et al. New challenges in psycho-oncology: Economic evaluation of psychosocial services in cancer: Challenges and best practice recommendations. *Psychooncology* 2019(28):3–10.

- 1  
2  
3 38 Brazier J, Ratcliffe J, Salomon JA, et al. Measuring and valuing health benefits for  
4 economic evaluation, 2nd edn. New York, Oxford: Oxford Univ. Pr 2017.  
5  
6 39 Patton MQ. Qualitative research and evaluation methods, 3rd edn. Thousand Oaks:  
7 Sage 2002.  
8  
9 40 Palinkas LA, Horwitz SM, Green CA, et al. Purposeful Sampling for Qualitative Data  
10 Collection and Analysis in Mixed Method Implementation Research. *Adm Policy Ment*  
11 *Health* 2015;42(5):533–44.  
12  
13 41 Creswell JW, Plano Clark VL. Designing and conducting mixed methods research. Los  
14 Angeles, London, New Delhi, Singapore, Washington DC, Melbourne: Sage 2018.  
15  
16 42 Dillman DA. Mail and telephone surveys: the total design method. New York: Wiley &  
17 Sons 1978.  
18  
19 43 Mayring P. Qualitative Inhaltsanalyse: Grundlagen und Techniken, 12th edn. Weinheim:  
20 Beltz 2015.  
21  
22 44 Bohnsack R. Gruppendiskussionsverfahren und dokumentarische Methode. In:  
23 Schaeffer D, Müller-Mundt G, eds. Qualitative Gesundheits- und Pflegeforschung. Bern:  
24 Huber 2002:305–25.  
25  
26 45 Swart E, Gothe H, Geyer S, et al. Gute Praxis Sekundärdatenanalyse (GPS): Leitlinien  
27 und Empfehlungen. *Gesundheitswesen* 2015;77(2):120–26.  
28  
29 46 Ansmann L, Kuhr K, Kowalski C. Mehrebenenanalysen in der organisationsbezogenen  
30 Versorgungsforschung – Nutzen, Voraussetzungen und Durchführung.  
31 *Gesundheitswesen* 2017;79(3):203–09.  
32  
33 47 Austin PC. An Introduction to Propensity Score Methods for Reducing the Effects of  
34 Confounding in Observational Studies. *Multivariate Behav Res* 2011;46(3):399–424.  
35  
36 48 Austin PC. Optimal caliper widths for propensity-score matching when estimating  
37 differences in means and differences in proportions in observational studies. *Pharm*  
38 *Stat* 2011;10(2):150–61.  
39  
40 49 Rosenbaum PR, Rubin DB. Constructing a Control Group Using Multivariate Matched  
41 Sampling Methods That Incorporate the Propensity Score. *The American Statistician*  
42 2012;39(1):33–38.  
43  
44  
45  
46  
47  
48  
49  
50  
51  
52  
53  
54  
55  
56  
57  
58  
59  
60

Table 1: Data collection of different domains of the intervention

| Section of evaluation                |                                      | Research Question                                                                                  | Data source                                            |                                                                                                                           | Procedure of data collection                                            | Time of data collection                |
|--------------------------------------|--------------------------------------|----------------------------------------------------------------------------------------------------|--------------------------------------------------------|---------------------------------------------------------------------------------------------------------------------------|-------------------------------------------------------------------------|----------------------------------------|
| Prospective evaluation               | Development of the isPO program      | Was the program developed as intended?                                                             | A                                                      | Focus group with isPO project developers ( $n = 8$ )                                                                      | Interviewed by evaluators                                               | During development                     |
|                                      |                                      |                                                                                                    | B                                                      | Documentary analyses (quarterly progress reports of all isPO project developers)                                          | Progress reports made for the external evaluation by project developers |                                        |
| Prospective and formative evaluation | Recruitment and selection of cluster | How where the cluster selected and recruited? Why have the cluster participated to the isPO study? | C                                                      | Written documentation of the recruitment procedure (quarterly progress reports)                                           | Progress reports made for the external evaluation by project developers | During recruitment of cluster          |
|                                      |                                      |                                                                                                    | D                                                      | Semi-structured interviews with the head of each health-care network ( $n = 4$ )                                          | Interviewed by evaluators                                               | At the beginning of intervention phase |
| Formative and summative evaluation   | Delivery and response of clusters    | How was the intervention delivered to each cluster?                                                | E                                                      | Documentary analyses of protocols and further documents of quarterly cross-network quality workshops ( $n = 3$ out of 10) |                                                                         | During intervention phase              |
|                                      |                                      |                                                                                                    | F                                                      | Quarterly standardized quality reviews of each cluster and protocols of each quality workshops                            |                                                                         | During intervention phase              |
|                                      |                                      | G                                                                                                  | Written documentation and attendance list of trainings | Before intervention                                                                                                       |                                                                         |                                        |
|                                      |                                      | H                                                                                                  | Standardized questionnaire of all                      | Two time-points                                                                                                           |                                                                         |                                        |

|  |                                             |                                                                                                                                             |         |                                                                                                                                                                                                        |                                                             |                                                |
|--|---------------------------------------------|---------------------------------------------------------------------------------------------------------------------------------------------|---------|--------------------------------------------------------------------------------------------------------------------------------------------------------------------------------------------------------|-------------------------------------------------------------|------------------------------------------------|
|  |                                             |                                                                                                                                             |         | providers ( $n \sim 200$ )                                                                                                                                                                             |                                                             | during intervention phase                      |
|  |                                             |                                                                                                                                             | I       | Clinical data of the isPO care program to assess accordance to the care concept                                                                                                                        |                                                             |                                                |
|  | Individual response of health care provider | What are the expectations/experience of/with the project?<br><br>What is the attitude of the health care providers toward the intervention? | J       | Focus groups ( $n = 5$ : 1 per cluster/network and 1 cross-network) and semi-structured interviews with the head of the psycho-oncology departments and leading physicians of each cluster ( $n = 8$ ) | Interviewed by evaluators                                   | During intervention phase                      |
|  |                                             |                                                                                                                                             | H       | Standardized questionnaire of all providers ( $n \sim 200$ )                                                                                                                                           | Self-assed by health care providers                         | Two time-points during intervention phase      |
|  | Individual response of patients             | Patient-experienced- and patient-reported-outcomes                                                                                          | K       | Focus groups ( $n = 3$ ) or according to the patient's wishes semi-structured single interviews                                                                                                        | Interviewed by evaluators                                   | During intervention phase                      |
|  |                                             |                                                                                                                                             | L       | Standardized questionnaire of all patients ( $n = 3,484$ )                                                                                                                                             | Self-assed by patients                                      | At the beginning and end of intervention phase |
|  | Context (intervention)                      | What is the context in which the intervention is being implemented?                                                                         | F, J, H | Focus groups with providers to assess 'care as usual' and standardized questionnaires to assess organizational characteristics                                                                         | Interviewed by evaluators or rather self-assed by providers | During intervention phase                      |
|  |                                             | What contextual factors promote or inhibit the implementation of the intervention?                                                          | A-L     | All data assessed throughout process evaluation                                                                                                                                                        |                                                             |                                                |

|                                     |                                                    |                                                                                                                                                                                                   |   |                                                                                                                                                                       |                                                |                                             |
|-------------------------------------|----------------------------------------------------|---------------------------------------------------------------------------------------------------------------------------------------------------------------------------------------------------|---|-----------------------------------------------------------------------------------------------------------------------------------------------------------------------|------------------------------------------------|---------------------------------------------|
|                                     | Appropriateness and Efficiency of the intervention | Was the treatment efficient in all levels of care?<br><br>How is the effectiveness and utilization of the intervention affected by sociodemographic factors, previous conditions and medications? | M | Clinical data of the isPO care program at an individual patient level                                                                                                 | Documented by health care providers            | During and at the end of intervention phase |
|                                     |                                                    |                                                                                                                                                                                                   | N | Statutory health insurance claims data of isPO-patients (4 years before intervention and 12 month of intervention)                                                    | provided by four German health insurance funds |                                             |
| Outcome evaluation                  | Effectiveness                                      | Is the psycho-oncological care program effective?                                                                                                                                                 | M | Clinical data (HADS value) of the isPO care program at an individual patient level to assess the primary outcome (reduction of anxiety and depression after 12 month) | Self-assed by patients                         | At the end of intervention phase            |
| Planned: Health economic evaluation | Cost-consequence analysis                          | What effects does the isPO program have on the costs and use of SHI health services in comparison to patients in standard care?                                                                   | N | Statutory health insurance claims data of $n \sim 300$ patients (decreased number of patients due to methodological restrictions and delayed data provision)          | provided by four German health insurance funds | At the end of intervention phase            |

# BMJ Open

## Evaluation of a complex integrated, cross-sectoral psycho-oncological care program (isPO): a mixed-methods study protocol

|                                 |                                                                                                                                                                                                                                                                                                                                                                                                                                                                                                                                                                                                                                                                                                                                                                                                                                                                                                                                                                                                                                                                                                                                                                                                                                                                                                                                                                                                                                                                                 |
|---------------------------------|---------------------------------------------------------------------------------------------------------------------------------------------------------------------------------------------------------------------------------------------------------------------------------------------------------------------------------------------------------------------------------------------------------------------------------------------------------------------------------------------------------------------------------------------------------------------------------------------------------------------------------------------------------------------------------------------------------------------------------------------------------------------------------------------------------------------------------------------------------------------------------------------------------------------------------------------------------------------------------------------------------------------------------------------------------------------------------------------------------------------------------------------------------------------------------------------------------------------------------------------------------------------------------------------------------------------------------------------------------------------------------------------------------------------------------------------------------------------------------|
| Journal:                        | <i>BMJ Open</i>                                                                                                                                                                                                                                                                                                                                                                                                                                                                                                                                                                                                                                                                                                                                                                                                                                                                                                                                                                                                                                                                                                                                                                                                                                                                                                                                                                                                                                                                 |
| Manuscript ID                   | bmjopen-2019-034141.R1                                                                                                                                                                                                                                                                                                                                                                                                                                                                                                                                                                                                                                                                                                                                                                                                                                                                                                                                                                                                                                                                                                                                                                                                                                                                                                                                                                                                                                                          |
| Article Type:                   | Protocol                                                                                                                                                                                                                                                                                                                                                                                                                                                                                                                                                                                                                                                                                                                                                                                                                                                                                                                                                                                                                                                                                                                                                                                                                                                                                                                                                                                                                                                                        |
| Date Submitted by the Author:   | 17-Dec-2019                                                                                                                                                                                                                                                                                                                                                                                                                                                                                                                                                                                                                                                                                                                                                                                                                                                                                                                                                                                                                                                                                                                                                                                                                                                                                                                                                                                                                                                                     |
| Complete List of Authors:       | Jenniches, Imke; University of Cologne, Institute of Medical Sociology, Health Services Research and Rehabilitation Science (IMVR)<br>Lemmen, Clarissa; University Hospital Cologne<br>Cwik, Jan; Universität zu Köln, Clinical Psychology and Psychotherapy<br>Kusch, Michael; University Hospital Cologne, Department of Internal Medicine<br>Labouvie, Hildegard; University Hospital Cologne, Department of Internal Medicine<br>Scholten, Nadine; Univ Cologne, IMVR - Institute for Medical Sociology, Health Services Research and Rehabilitation Science<br>Gerlach, Alexander; University of Cologne, Department of Psychology<br>Stock, Stephanie; Universität zu Köln Institut für Gesundheitsökonomie und Klinische Epidemiologie<br>Samel, Christina; University Hospital of Cologne, Institute of Health Economics and Clinical Epidemiology<br>Hagemeier, Anna; University of Cologne, Institute of Medical Statistics and Computational Biology<br>Hellmich, Martin; University of Cologne, 3) Institute of Medical Statistics and Computational Biology (IMSB)<br>Haas, Peter; University of Applied Sciences and Arts Dortmund, Department of Computer Science (Medical Informatics)<br>Hallek, Michael; University Hospital Cologne, Department of Internal Medicine<br>Pfaff, Holger; University of Cologne, Cologne, Germany,<br>Dresen, Antje; University of Cologne, Institute of Medical Sociology, Health Services Research and Rehabilitation Science |
| <b>Primary Subject Heading</b>: | Health services research                                                                                                                                                                                                                                                                                                                                                                                                                                                                                                                                                                                                                                                                                                                                                                                                                                                                                                                                                                                                                                                                                                                                                                                                                                                                                                                                                                                                                                                        |
| Secondary Subject Heading:      | Oncology, Patient-centred medicine, Research methods                                                                                                                                                                                                                                                                                                                                                                                                                                                                                                                                                                                                                                                                                                                                                                                                                                                                                                                                                                                                                                                                                                                                                                                                                                                                                                                                                                                                                            |
| Keywords:                       | study protocol, health services research, psycho-oncology, mixed-methods, implementation, process evaluation                                                                                                                                                                                                                                                                                                                                                                                                                                                                                                                                                                                                                                                                                                                                                                                                                                                                                                                                                                                                                                                                                                                                                                                                                                                                                                                                                                    |
|                                 |                                                                                                                                                                                                                                                                                                                                                                                                                                                                                                                                                                                                                                                                                                                                                                                                                                                                                                                                                                                                                                                                                                                                                                                                                                                                                                                                                                                                                                                                                 |

1  
2  
3  
4  
5  
6  
7  
8  
9  
10  
11  
12  
13  
14  
15  
16  
17  
18  
19  
20  
21  
22  
23  
24  
25  
26  
27  
28  
29  
30  
31  
32  
33  
34  
35  
36  
37  
38  
39  
40  
41  
42  
43  
44  
45  
46  
47  
48  
49  
50  
51  
52  
53  
54  
55  
56  
57  
58  
59  
60

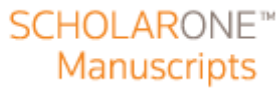



# Evaluation of a complex integrated, cross-sectoral psycho-oncological care program (isPO): a mixed-methods study protocol

Imke Jenniches<sup>1</sup>, Clarissa Lemmen<sup>3</sup>, Jan C. Cwik<sup>2</sup>, Michael Kusch<sup>6</sup>, Hildegard Labouvie<sup>6</sup>, Nadine Scholten<sup>1</sup>, Alexander L. Gerlach<sup>2</sup>, Stephanie Stock<sup>3</sup>, Christina Samel<sup>4</sup>, Anna Hagemeyer<sup>4</sup>, Martin Hellmich<sup>4</sup>, Peter Haas<sup>5</sup>, Michael Hallek<sup>6</sup>, Holger Pfaff<sup>1</sup>, Antje Dresen<sup>1\*</sup>

## Author affiliations

<sup>1</sup>Institute of Medical Sociology, Health Services Research, and Rehabilitation Science (IMVR), Faculty of Human Sciences and Faculty of Medicine, University of Cologne, Germany

<sup>2</sup>Department of Psychology, University of Cologne, Germany

<sup>3</sup>Institute for Health Economics and Clinical Epidemiology, University Hospital Cologne, Cologne, Germany

<sup>4</sup>Institute of Medical Statistics and Computational Biology, Medical Faculty, University of Cologne, Germany

<sup>5</sup>Department of Computer Science (Medical Informatics), University of Applied Sciences and Arts, Dortmund, Germany

<sup>6</sup>Department I of Internal Medicine; Center for Integrated Oncology Cologne-Bonn, University Hospital Cologne, Cologne, Germany

\*corresponding author

Dr. Antje Dresen

Eupener Straße 129

50933 Cologne

Germany

antje.dresen@uk-koeln.de

Tel: 0049 221 478 97168

Keywords: study protocol, health services research, psycho-oncology, mixed-methods, data linkage, implementation, process evaluation, regression discontinuity design

1  
2  
3 Word Count: 4.374 words  
4

## 5 **Abstract**

7 **Introduction:** International standards of care require the complete integration of psycho-  
8 oncological care into biomedical cancer treatment. The structured integrated, cross-sectoral  
9 psycho-oncological program "isPO" is aiming to ensure a provision of care in inpatient and  
10 outpatient settings according to a stepped-care approach. Up to now, psycho-oncological care  
11 is missing regulated and standardized processes to demonstrate the effectiveness. This study  
12 protocol describes the process and outcome evaluation that is conducted, along with the isPO  
13 study. The program evaluation is aiming to proof effectiveness, explain potential discrepancies  
14 between expected and observed outcomes. Additionally, provide insight into the  
15 implementation process, as well as contextual factors that might promote or inhibit the  
16 dissemination and implementation of the stepped care program will be gained. In addition to  
17 these measures, a cost consequence analysis will provide further evidence aimed at  
18 integrating psycho-oncological care into primary health care.  
19

20 **Methods and Analysis:** The evaluation concept is based on a tripartite strategy consisting of  
21 a prospective, formative and summative evaluation. To capture all determinants a concurrent  
22 mixed-method design is applied comprising qualitative (interviews and focus groups) and  
23 quantitative (standardized questionnaires) surveys of patients and health care providers. In  
24 addition, analysis of the psycho-oncological care data (isPO care data) and statutory health  
25 insurance claims data will be conducted. Primary and secondary data will complement one  
26 another (data linkage) to obtain a more comprehensive picture of the effectiveness and  
27 implementation of the complex intervention within the isPO study.  
28

29 **Ethics and Dissemination:** The study has been approved by the ethics committee of the  
30 Medical Faculty of the University of Cologne. For all collected data, the relevant national and  
31 European data protection regulations will be considered. All personal identifiers (e.g. name,  
32 date of birth) will be pseudonymised. Dissemination strategies include annual reports as well  
33 as quality workshops for the organizations, the presentation of results in publications and on  
34 conferences, and public relations.  
35

## 36 **Registration Details:**

37 The study has been registered in the German Clinical Trials Register (No. DRKS00015326).  
38  
39  
40  
41  
42  
43  
44  
45  
46  
47  
48  
49  
50  
51  
52  
53  
54  
55  
56  
57  
58  
59  
60

## Strengths and Limitations

- The mixed-methods approach (qualitative and quantitative data) and the linking of primary and secondary data sources allow a multidimensional view on the quality and effectiveness of the psycho-oncological care program.
- Results of the process evaluation are directly used to continuously improve the care program.
- Regression discontinuity design (RDD) allows estimation of the average treatment effect since a Randomised controlled trial (RCT) is not possible for ethical reasons in this specific setting
- The cost-consequence is of limited generalizability but is able to estimate a broader range of costs and consequences and help decision makers structure their consideration of the different consequences of a decision
- Risk of selection bias due to the quasi-experimental study design, in which patients are assigned to care-level groups on the basis of a cut-off value (validity of cut-off value will be analysed alongside with the primary outcome to ensure group equivalence)

## Introduction

There were 14.1 million new cancer cases and 32.6 million people living with cancer (within 5 years) in 2012 worldwide [1]. In Germany, recent epidemiology studies showed an annual new cancer cases of about 480.000 cancer cases in 2014 [2]. A cancer diagnosis is often associated with emotional distress as well as symptoms of anxiety and depression [3–5]. Psychological well-being is increasingly seen as an important component of cancer care. In line with this, psycho-oncology is an area of multi-disciplinary interest that deals with the psychological, social, behavioural, and ethical aspects of cancer [6, 7]. This subspecialty addresses the two major psychological dimensions of cancer: the psychological responses of patients to cancer at all stages of the disease, and that of their families and caretakers; and the psychological, behavioural and social factors that may influence the disease process. Overall psycho-oncology aims to enable cancer patients to cope with their illness and actively contribute to their medical treatment and follow-up care [6–8]. Although the German national cancer plan [9] as well national and international guidelines and standards of care [10–12] call for the full integration of psycho-oncology into biomedical cancer treatment, essential structures, processes and financing for psycho-oncological treatment is not yet established [13–16]. As funding is not uniformly regulated in Germany, the affordability of psycho-oncological treatment is a major challenge for private and statutory health insurances (SHI) [14–16].

1  
2  
3 Systematic reviews and meta-analyses show that different psychotherapeutic and  
4 psychosocial intervention are associated with small-to-medium effects on quality of life and  
5 emotional distress [17–20]. Effect size was positively correlated with high levels of distress at  
6 the starting point and the duration of intervention [17]. However, most of the studies are  
7 restricted to female breast-cancer patients [17, 21] and do not comprise a pre-defined  
8 screening process of cancer patients to deliver need-based psycho-oncological care in a  
9 stepped-care manner.  
10  
11

12  
13  
14 Therefore, the integrated cross-sectional psycho-oncology (isPO) program aims to develop,  
15 implement and evaluate a new stepped-care psychosocial and psychotherapeutic care  
16 program for adult newly diagnosed cancer patients. The German version of the widely  
17 accepted “hospital anxiety and depression scale” (HADS) [11, 22, 23] and two self-developed  
18 and validated questionnaires (publication in preparation; [24, 25]), will be used as screening  
19 instruments to assess individual patient needs, i.e. the assignment to a specific care level, and  
20 as an outcome measure. The RDD as a regression-based quasi-experimental approach is  
21 used to measure efficacy, reduction of anxiety and depression after 12 months of treatment  
22 via HADS-questionnaire. Secondary outcomes are the quality of the care program, including  
23 feasibility, patient satisfaction and perceived benefit.  
24  
25  
26

27  
28  
29 Because an effectiveness study is limited in its ability to provide information regarding whether  
30 an intervention is successful (including the implementation process) [26] and what are relevant  
31 costs and type of costs, the isPO study is accompanied by a complex process evaluation and  
32 a health economic analysis. This external evaluation aims to gain guidance on the quality and  
33 appropriateness of the psycho-oncological care program and on implementation and  
34 dissemination strategies for complex health intervention. The evaluation will focus on  
35 implementation outcomes, such as acceptance, feasibility, appropriateness, effectiveness and  
36 costs [27], as well as patient reported outcomes, such as quality of life and satisfaction with  
37 care.  
38  
39

40  
41  
42 In order to cover all relevant aspects, two frameworks are combined for the analysis: The  
43 Medical Research Council (MRC)-Framework for the evaluation of complex interventions [28]  
44 and the Consolidated Framework for Implementation Research (CFIR) [29]. The MRC  
45 guidance defines the function of process evaluation at different stages of development,  
46 evaluation and implementation of complex intervention and was therefore used to design the  
47 tripartite evaluation design, consisting of a prospective, formative and summative part. This  
48 framework gives equal attention to the implementation itself, the mechanism of impact  
49 (participant’s responses and mechanisms of change) and the influence of contextual factors  
50 that may act as barriers and facilitators to implementation, dissemination and intervention  
51 effects [28, 30]. For the systematic identification and evaluation of relevant context factors and  
52  
53  
54  
55  
56  
57  
58  
59  
60

1  
2  
3 potential barriers and facilitators, constructs related to an effective implementation of the CFIR  
4 are used. This framework captures the complexity of the implementation across the key  
5 aspects and provides a theoretically based coverage of the internal and external settings, the  
6 characteristics of the intervention and the people involved, and the process itself. This meta-  
7 theoretical framework can be used across all phases of implementation (pre-, during, and post-  
8 implementation) [29, 31], and has been shown to be effective for guiding successful  
9 implementation across numerous health domains, such as weight management and cancer  
10 screening [31, 32]. Overall, both frameworks advocate a multilevel contextual perspective on  
11 the implementation and evaluation of interventions. The objective in using these two  
12 frameworks was to ensure that we took into account and addressed all the important factors  
13 based on well-validated constructs that are essential for the evaluation of a new health program  
14 and its effective implementation.  
15  
16  
17  
18  
19  
20  
21  
22  
23

#### 24 Main research questions

- 26 • Does the structured 12-month psycho-oncological care program reduce anxiety and  
27 depression in cancer patients?
- 28 • How are quality of care, structures and processes perceived by patients and  
29 employees, and what is the experience of psychotherapists, social workers, onco-  
30 guides, nurses and physicians implementing isPO across settings?
- 31 • Which contextual factors and which baseline implementation constructs (CFIR)  
32 predict implementation success for each health-care network?
- 33 • What effects does the isPO program have on costs and use of SHI health services  
34 in comparison to standard care?
- 35 • Do the structures and contents of the health care program provide a suitable basis  
36 for their integration in the standard health care system?

#### 44 Secondary research questions:

- 46 • How do sociodemographic factors, comorbidities, the cancer entity or the form of  
47 medical treatment influence the effectiveness of psycho-oncological care?
- 48 • Which sociodemographic and health care-related risk factors predict the extent of  
49 psychological stress reactions on the initial diagnosis of cancer?

## Methods and Analysis

### Study Design

The project isPO aims to develop, implement, and evaluate a new cross-sectoral form of psycho-oncological care. The study receives funding from the German Federal Joint Committee (G-BA), a public legal entity comprising the four leading umbrella organizations of the self-governing German healthcare system. During the 4-year project (October 2017 – September 2021), up to 3.484 outpatients and inpatients of full legal age ( $\geq 18$  years) with a primary diagnosis of cancer (ICD-10-GM C00 – C97) will be included in the isPO program. During the project period, patients will be treated for a period of 12 months from cancer diagnosis. Patients will be assigned to either the control group (HADS  $\leq 14$ ; care level 1 and 2) or the intervention group (HADS  $\geq 15$ ; care level 3) depending on the anxiety and depression level upon enrollment in the study. The control group will receive support of an onco-guide (level 1) or psychosocial support (level 2), whereas the intervention group receives psychotherapeutic treatment (level 3). Patients with a starting HADS  $\pm 2$  around the cut-off will be evaluated for the treatment effect. This is based on the assumption that the distribution around the threshold is at random [33]. The treatment effect (primary outcome) is analysed using the RDD for patients with initial HADS values between 13 and 16 [34]. The RDD represents a valid alternative to RCT studies to estimate treatment effects [35]. Anticipated treatment effects (reduction of HADS after 12 months of psycho-oncological treatment) are expected to lead to a discontinuity of the linear regression at the cut-off. In the course of the effectiveness measure the preset cut-off value of the HADS will also be validated. In addition, further self-developed screening instruments are used to assess individual psychosocial risk factors and the cognitive-emotional response to cancer diagnosis and to assign patients to a certain level of care (level 1 or 2). Publication of the validation of these screening instruments is in preparation [24, 25].

In order to ensure the full integration of psycho-oncological treatment into clinical care, the psycho-oncological care is provided under supervision of the treating physician. The physicians therefore recommend their cancer patients for the isPO program. Depending on the needed level of care either onco-guides, trained former cancer patients (level 1), social worker (level 2) or psychotherapists (level 3) will take over the treatment. Recruitment and care of the patients started in January 2019 and will continue until March 2021.<sup>1</sup>

The development and implementation of the isPO program are based on the model of program theory for health promotion programs [36]. The process and outcome evaluation, carried out alongside the isPO care program, applies a mixed-methods design based on several data

---

<sup>1</sup> Publication of the detailed description of the psycho-oncological stepped-care concept of the isPO project is in preparation.

1  
2  
3 sources, including health insurance claims data, clinical psychotherapeutic and psychosocial  
4 data (isPO care data) as well as qualitative and quantitative surveys of patients and health  
5 care providers. Both quantitative and qualitative data are collected in parallel and analysed  
6 separately. The results are then compared. In addition, there is an increasing need to assess  
7 the economic impact of psycho-oncology services on cancer in order to provide the necessary  
8 evidence to guide decision-making [37]. Not only the efficacy, but also the cost-effectiveness  
9 of an intervention will be decisive, whether it will be transferred into standard care. Therefore,  
10 a health economic evaluation of isPO is necessary and also requested by the SHI. A cost-  
11 consequences analysis from the point of view of the German health insurance funds using SHI  
12 claims data is planned. This analysis examines costs and consequences without attempting to  
13 isolate a single consequence or aggregate consequences into a single measure [38]. The  
14 health economic evaluation is financed by the University Hospital Cologne's own funds.  
15 Furthermore, fidelity, quality and feasibility will be monitored during the entire project using the  
16 clinical psychotherapeutic and psychosocial documentation (isPO care data), quarterly quality  
17 reviews of each network and quarterly inter- and cross-network quality workshops.  
18  
19  
20  
21  
22  
23  
24  
25  
26  
27  
28

### 29 Setting

30  
31 The isPO study is conducted in four health-care networks in North Rhine-Westphalia  
32 (Germany) each consisting of one hospital (rural, urban or university) with two or more certified  
33 oncological centres in collaboration with several resident physicians.<sup>2</sup> All four sites were  
34 selected based on predetermined criteria that are representative for the different health care  
35 providers in rural and urban regions.<sup>3</sup> For the process and outcome evaluation all participating  
36 patients (approx. 3.400) and health care providers (approx. 200), including nurses,  
37 psychotherapists, social workers, and physicians, will be included in the quantitative study. For  
38 qualitative studies participants will be selected based on the principal of “purposeful sampling”,  
39 a technique widely used in qualitative research for the identification and selection of  
40 information-rich cases for the most effective use of limited resources [39]. This involves  
41 identifying and selecting individuals or groups of individuals that are especially knowledgeable  
42 about or experienced with a phenomenon of interest [39–41]. The potential selection bias  
43 caused by this sampling method is offset by the mixed-method design, which increases the  
44 credibility of results.  
45  
46  
47  
48  
49  
50  
51  
52  
53

---

54  
55 <sup>2</sup> Contrary to hospitals, that provide basic medical cancer care, oncology centres bundle competences in the  
56 areas of treatment, cooperation and research. A certified oncological centre is a network of qualified and jointly  
57 certified, multi- and interdisciplinary, trans-sectoral and, if necessary, cross-locational facilities (hospitals,  
58 physicians, rehabilitation facilities) which best cover the various care areas for patients as far as possible. To meet  
59 the rapidly growing need for comprehensive, holistic, multidisciplinary and integrative oncological care of the  
60 population, these oncology competence centres have emerged.

<sup>3</sup> Publication of the detailed description of the psycho-oncological stepped-care concept of the isPO project  
including the inclusion criteria for the networks is in preparation.

### Patient and public involvement

The House of the Cancer Patient Support Associations of Germany (association of ten cancer support groups) as well as the German Cancer Society North Rhine-Westphalia are also applicants of the study. Both groups have been working on the concept, design and implementation since the planning of the study and give advice to the scientists regarding the outcome measures and research questions. They assess and represent the patient's perspective and will provide up-to-date information about the project status for the public on their homepages and events. In addition, all questionnaires were pre-tested with at least three former cancer patients to ensure that the questionnaires met the needs of a patient in content, length and comprehensibility. The questionnaires were adapted as best as possible based on the patients' comments.

### Process and outcome evaluation design

#### *Prospective, formative and summative evaluation*

Due to the high complexity of the isPO project, a multifaceted evaluation design is applied. For the current study, the MRC framework by *Moore et al.* [28] for process evaluation of complex interventions in combination with the CFIR constructs seems to be suitable. Therefore, a tripartite evaluation design will be applied comprising a prospective, formative, and summative evaluation. Prospective and formative the concept, implementation and appropriateness will be evaluated on an ex ante and in-process basis. All results will be reported and promptly used to optimize the care program and the implementation process. Finally, primary and secondary outcomes, as well as the transferability, will be evaluated summatively. By using this multidimensional mixed-method design, it will be possible to account for the different contextual factors influencing the implementation as well as patient-related and patient-reported outcomes. Among others we will report implementation outcomes, such as acceptability, appropriateness, feasibility, fidelity, efficiency, effectiveness, and satisfaction [27]. In addition to patient-related factors, such as age, comorbidities or sociodemographic factors, variables such as structural conditions, readiness, and attitude towards change, knowledge-based and experience-based variables can play a role on the care provider's side. The planned data collection and the corresponding data sources as well as research questions are listed in Table 1.



Table 1: Data collection of different domains of the intervention

| Section of evaluation                |                                             | Research Question                                                                                                                           | Data source                                                   |                                                                                                                                                                                                                | Procedure of data collection                                            | Time of data collection                   |
|--------------------------------------|---------------------------------------------|---------------------------------------------------------------------------------------------------------------------------------------------|---------------------------------------------------------------|----------------------------------------------------------------------------------------------------------------------------------------------------------------------------------------------------------------|-------------------------------------------------------------------------|-------------------------------------------|
| Prospective evaluation               | Development of the isPO program             | Was the program developed as intended?                                                                                                      | A                                                             | Focus group with isPO project developers ( <i>n</i> = 8)                                                                                                                                                       | Interviewed by evaluators                                               | During development                        |
|                                      |                                             |                                                                                                                                             | B                                                             | Documentary analyses (quarterly progress reports of all isPO project developers)                                                                                                                               | Progress reports made for the external evaluation by project developers |                                           |
| Prospective and formative evaluation | Recruitment and selection of cluster        | How where the cluster selected and recruited? Why have the cluster participated to the isPO study?                                          | C                                                             | Written documentation of the recruitment procedure (quarterly progress reports)                                                                                                                                | Progress reports made for the external evaluation by project developers | During recruitment of cluster             |
|                                      |                                             |                                                                                                                                             | D                                                             | Semi-structured interviews with the head of each health-care network ( <i>n</i> = 4)                                                                                                                           | Interviewed by evaluators                                               | At the beginning of intervention phase    |
| Formative and summative evaluation   | Delivery and response of clusters           | How was the intervention delivered to each cluster?<br><br>How was the intervention adopted by each cluster?                                | E                                                             | Documentary analyses of protocols and further documents of quarterly cross-network quality workshops ( <i>n</i> = 3 out of 10)                                                                                 |                                                                         | During intervention phase                 |
|                                      |                                             |                                                                                                                                             | F                                                             | Quarterly standardized quality reviews of each cluster and protocols of each quality workshops                                                                                                                 |                                                                         | During intervention phase                 |
|                                      |                                             |                                                                                                                                             | G                                                             | Written documentation and attendance list of trainings                                                                                                                                                         |                                                                         | Before intervention                       |
|                                      |                                             |                                                                                                                                             | H                                                             | Standardized questionnaire of all providers ( <i>n</i> ~ 200)                                                                                                                                                  |                                                                         | Two time-points during intervention phase |
|                                      |                                             |                                                                                                                                             | I                                                             | Clinical data of the isPO care program to assess accordance to the care concept                                                                                                                                |                                                                         |                                           |
|                                      | Individual response of health care provider | What are the expectations/experience of/with the project?<br><br>What is the attitude of the health care providers toward the intervention? | J                                                             | Focus groups ( <i>n</i> = 5: 1 per cluster/network and 1 cross-network) and semi-structured interviews with the head of the psycho-oncology departments and leading physicians of each cluster ( <i>n</i> = 8) | Interviewed by evaluators                                               | During intervention phase                 |
| H                                    |                                             |                                                                                                                                             | Standardized questionnaire of all providers ( <i>n</i> ~ 200) | Self-assesed by health care providers                                                                                                                                                                          | Two time-points during intervention phase                               |                                           |

|                                     |                                                    |                                                                                                                                                                                               |         |                                                                                                                                                                       |                                                                |                                                |
|-------------------------------------|----------------------------------------------------|-----------------------------------------------------------------------------------------------------------------------------------------------------------------------------------------------|---------|-----------------------------------------------------------------------------------------------------------------------------------------------------------------------|----------------------------------------------------------------|------------------------------------------------|
|                                     | Individual response of patients                    | Patient-experienced- and patient-reported-outcomes                                                                                                                                            | K       | Focus groups ( $n = 3$ ) or according to the patient's wishes semi-structured single interviews                                                                       | Interviewed by evaluators                                      | During intervention phase                      |
|                                     |                                                    |                                                                                                                                                                                               | L       | Standardized questionnaire of all patients ( $n = 3,484$ )                                                                                                            | Self-assessed by patients                                      | At the beginning and end of intervention phase |
|                                     | Context (intervention)                             | What is the context in which the intervention is being implemented?                                                                                                                           | F, J, H | Focus groups with providers to assess 'care as usual' and standardized questionnaires to assess organizational characteristics                                        | Interviewed by evaluators or rather self-assessed by providers | During intervention phase                      |
|                                     |                                                    | What contextual factors promote or inhibit the implementation of the intervention?                                                                                                            | A-L     | All data assessed throughout process evaluation                                                                                                                       |                                                                |                                                |
|                                     | Appropriateness and Efficiency of the intervention | Was the treatment efficient in all levels of care?<br>How is the effectiveness and utilization of the intervention affected by sociodemographic factors, previous conditions and medications? | M       | Clinical data of the isPO care program at an individual patient level                                                                                                 | Documented by health care providers                            | During and at the end of intervention phase    |
|                                     |                                                    |                                                                                                                                                                                               | N       | Statutory health insurance claims data of isPO-patients (4 years before intervention and 12 month of intervention)                                                    | provided by four German health insurance funds                 |                                                |
| Outcome evaluation                  | Effectiveness                                      | Is the psycho-oncological care program effective?                                                                                                                                             | M       | Clinical data (HADS value) of the isPO care program at an individual patient level to assess the primary outcome (reduction of anxiety and depression after 12 month) | Self-assessed by patients                                      | At the end of intervention phase               |
| Planned: Health economic evaluation | Cost-consequence analysis                          | What effects does the isPO program have on the costs and use of SHI health services in comparison to patients in standard care?                                                               | N       | Statutory health insurance claims data of $n \sim 300$ patients (decreased number of patients due to methodological restrictions and delayed data provision)          | provided by four German health insurance funds                 | At the end of intervention phase               |

### *Quantitative data collection and analysis*

Within the scope of the study patients and health care provider, such as physicians, nurses, psychologists, social worker, and onco-guides, are questioned at two points in time by means of a written (postal) survey. The aim of these surveys and the subsequent quantitative analysis is to determine the appropriateness and feasibility of the stepped-care program. Essential aspects of the patient questionnaire are satisfaction with the psycho-oncological care, other social support, and quality of life. The provider questionnaire focuses on the attitude towards the new psycho-oncological program, intervention characteristics, and personal as well as organizational barriers and facilitators, such as attitude towards change and corporate culture [29].

In order to archive the highest possible response rate, the survey is conducted according to Dillmann's "Total Design Method" [42]. To create the questionnaires and to import paper-based survey data, the data capturing software Teleform® is used. Validated scales are analysed according to the coding manual. Psychometric analyses of factorial validity and reliability are carried out on the scales developed in-house.

### *Qualitative data collection and analysis*

To enable patients to describe their experiences with the intervention, approximately 30 patients will be interviewed. In addition to the quantitative surveys, this qualitative analysis provides a deeper insight into the perceptions and opinions of the respondents. In addition, this method enables the identification of further factors that influence patient acceptance and perceived benefit. To meet the needs of vulnerable patients, such as cancer patients, respondents can choose to participate in a single interview or focus group. The number of interviews will be adapted with respect to the saturation point. Participants will be approached through the data trustee of the project, who is the only one (other than the health care provider) with access to patient contact addresses for the data linkage and patient surveys. Through the targeted selection of interviewees, we take relevant criteria such as age, gender, assigned level of care, and region into account. In addition, we will conduct approximately eight focus groups (six to eight persons each) with health care providers and interviews with each network coordinator (quality management representatives of the clinics), leading physicians and each leading psycho-oncologist of the four health-care networks (four persons each). Interviews and focus groups will be guided by scientific rules, audio recorded, transcribed, pseudonymised, and analysed based on content [43] or documentary analyses [44].

Overall, these qualitative analyses will provide in-depth understanding of the mechanisms of action, how context affects implementation or why those who carry out or receive the

1  
2  
3 intervention engage as planned or not. It gives a greater insight into barriers and facilitators of  
4 the implementation process at the different sites as well as into the perception of different  
5 professions. In this way, we will collect data from all participants on key aspects of the process  
6 and combine these results with in-depth data from smaller samples.  
7  
8

9  
10 *Administrative data analysis: statutory health insurance and clinical data – data linkage*  
11

12 In order to gain a greater insight into the impact of acute cancer treatment, health, and medical  
13 history and comorbidities on the effectiveness of psycho-oncological care and the changing  
14 use of health care services during the care program, the following data sets will be analysed:  
15  
16

- 17 1.) Statutory health insurance claims data of all recruited patients insured with one of the  
18 four largest German health insurance funds, covering around 70 % of the statutory  
19 insured patients in Germany
- 20 2.) Clinical psychological and psychosocial data (isPO care data) from each recruited  
21 patient in each network (hospital)
- 22 3.) Cancer registry data from each recruited patient in each network (hospital)

23  
24  
25  
26  
27 Statutory health insurance claims data will be analysed at each care level within the framework  
28 of the stepped-care program and at regional level (each network). In addition to patient  
29 characteristics, this hierarchical data set contains further information at the provider level. Data  
30 at the patient level includes age, gender, insurance status, inpatient and outpatient treatment,  
31 diagnoses, and drug prescriptions. At the provider level, it is possible to consider the attending  
32 physicians and hospitals at regional and medical specialist level. Hierarchical multi-level  
33 analysis allows us to consider the clustering of data at different levels in order to identify  
34 relevant influencing factors.  
35  
36  
37  
38  
39

40 Clinical psychological and psychosocial data (isPO care data) of each recruited patient will  
41 provide information about the delivered care in each network and at each care level. This  
42 enables the isPO program's range, fidelity and dose to be analysed.  
43  
44

45 A third data set (cancer registry data), containing the differentiated medical diagnosis and  
46 biomedical treatment, will provide additional information on the medical status of the patients  
47 included. This dataset will include additional clinical measures such as the tumour state,  
48 surgical procedures or the type of chemotherapy or radiotherapy. From the scope of cancer  
49 registry data, group differences are extracted, for example, in terms of age, entities or gender.  
50 The analyses will provide further insights into the influence of biomedical treatment or the  
51 severity of the disease on the effectiveness of psycho-oncological treatment.  
52  
53  
54  
55  
56

57 All analyses follow the guidelines and recommendations of Good Practice of Secondary Data  
58 Analysis [45]. As the data are not collected for scientific reasons but for reimbursement,  
59 resulting impact on the validity of the data is taken into account.  
60

1  
2  
3 By linking the administrative data sets with the survey results, the perceived benefits and  
4 quality of life as well as sociodemographic data can be linked with the more general health  
5 status and the use of other health services. It also enables the identification of predictors of  
6 increased stress response after cancer diagnosis. In addition, multi-level analyses will take  
7 into account the health context in each network (hospital) and the relationship between the  
8 context and health care outcomes [46].  
9  
10  
11  
12  
13

### 14 15 Health economic analysis

16  
17 A health economic analysis is conducted in form of a cost-consequences analysis from  
18 German SHI perspective. This economic evaluation is based on SHI claims data. The  
19 advantage of using routine data for evaluation is that cross-sectoral costs and the use of health  
20 services are taken into account. The result can help the decision-makers to assess and  
21 compare the costs and use of health services between isPO patients and patients in standard  
22 care. The intervention group (isPO patient) is selected based on the isPO inclusion criteria,  
23 legal age ( $\geq 18$  years) and a primary diagnosis of cancer (ICD-10-GM C00 – C97). However,  
24 due to the delayed availability of SHI claims data, not all isPO patients can be considered in  
25 the health economic analysis.  
26  
27  
28  
29  
30  
31

32 IsPO patients (intervention group) will be compared to patients in standard care (control group).  
33 The control group is generated based on SHI claims data using propensity score matching  
34 [47–49]. Each isPO patient will be assigned to up to five patients from standard health care  
35 according to predefined criteria. Propensity score matching is a method to balance covariates  
36 observed in non-randomized studies between subjects in the control and intervention groups.  
37 The matching is carried out by the participating statutory health insurance funds, so that the  
38 data of the control group can then be transferred and analysed anonymously. Costs and use  
39 of inpatient and outpatient treatments, medicines, remedies and aids as well as periods of  
40 inability to work will be analysed. The economic evaluation examines differences in costs, use  
41 of health services and hospitalisation during 12 months of treatment in isPO compared to  
42 standard care. Costs and consequences of different outcomes are listed separately in a  
43 disaggregated format and the results are presented using descriptive statistics.  
44  
45  
46  
47  
48  
49  
50  
51  
52

### 53 **Ethics and Dissemination**

#### 54 Ethical considerations

55  
56 The study was reviewed and has received ethics approval from the ethics committee of the  
57 Medical Faculty University hospital of Cologne and has been registered within the German  
58 Clinical Trial register (No. DRKS00015326). Up to the point of submission, there was still no  
59  
60

1  
2  
3 ethics vote available for the health economic analysis. Review of the health economics analysis  
4 by the ethical commission is currently in progress. For all analysed data relevant national and  
5 international data protection regulations will be respected. In accordance with national  
6 requirements and the principles of the Declaration of Helsinki, written informed consent will be  
7 obtained from all participants prior to enrolment and all study participants can revoke their  
8 consent without any negative consequences. The focus groups, as well as the interviews will  
9 be performed solely by trained researchers, trying to minimize the psychological burden of the  
10 patients as well as the health care providers. The survey will be performed pseudonymously.  
11 Personal identifiers will be only recorded to manage the responses to the questionnaire.  
12 Confidentiality will be maintained at all levels of data management. Cognitive pre-test on the  
13 postal survey will be performed before dissemination in order to facilitate the answering of the  
14 questionnaire and reduce mental stress. The study information for patients is accompanied by  
15 a written consent, in which patients also give their written consent to the storage, processing  
16 and linking of all obtained data. This also includes the planned data linkage between the  
17 statutory health insurance claims data, the clinical psychological and psychosocial data (isPO  
18 care data) and the cancer registry data from each recruited patient in each network (hospital).  
19 All personal names are removed and all data records used are sufficiently coarsened to ensure  
20 pseudonymisation, especially with regard to data linkage. A complex approach to data  
21 protection, involving the use of three different pseudonyms (for the different data transmission  
22 channels) and the establishment of a project data trustee, who is not involved in data analysis,  
23 ensures the highest possible level of data protection in line with the requirements of the  
24 European General Data Protection Regulation (GDPR).  
25  
26  
27  
28  
29  
30  
31  
32  
33  
34  
35  
36  
37  
38  
39

#### 40 Dissemination

41  
42 The isPO project partners have agreed on publication guidelines, a publication strategy and a  
43 publication plan. The publication strategy consists of the dissemination in scientific peer-  
44 reviewed journals and presentations at national and international academic conferences.  
45 Moreover, there is a strategy to ensure dissemination in popular science forums, such as  
46 research gate, and in public media. Professional exchange and patient participation will be a  
47 prominent task within in the project to gain the necessary dissemination and sustainability of  
48 the research findings. Therefore, a homepage was created to spread up to date news on the  
49 project progress. In addition, the House of the Cancer Patient Support Associations of  
50 Germany (association of ten cancer support groups) as well as the German Cancer Society  
51 North Rhine-Westphalia will provide up-to-date information on their homepages and events.  
52  
53  
54  
55  
56  
57  
58

59 The publication plan will evolve over time but includes the following planned scientific activities:

- 60 • Six Ph.D. theses at four different scientific institutes of the university of cologne

- About twenty scientific articles in different peer-reviewed journals
- Local seminars at the study sites
- Information events of cancer self-help groups and the Cancer Society North Rhine-Westphalia
- Special sessions planned at the 19. annual meeting of the PSO (Psycho-Oncology Committee of the German cancer Society) in 2020 and the German congress of Health Care Research (DKVF) 2020
- Presentations at national and international conferences
- Popular science presentations in national media and healthcare magazines

## Discussion

IsPO aims to reduce symptoms of anxiety and depression in cancer inpatients and outpatients, to improve their psychosocial situation and to promote self-help. Different sectors of the German health care system and a wide range of scientific institutes cooperate to implement and evaluate a cross-sectoral psycho-oncological care program more responsive to patients' needs. The evaluation of the new care program will provide important evidence-based results from the perspective of patients and practitioners for cross-sectoral psychosocial and psycho-oncological care of patients with initial cancer diagnosis and opens the way for a transfer of the care program into standard care. Cost-consequence analyses examine whether the care concept also favors the effective use of existing resources.

From a methodological point of view, the proposed project is highly innovative. It takes into account all relevant perspectives, enables new needs-based health care, has a prospective, multicentre and controlled design and offers a linkage of primary and secondary data from different health insurance funds for efficacy, effectiveness and cost analyses.

The aim of the project is to meet the requirements that make it possible to implement this new form of care in the standard care system in Germany. The care program will combine approaches of cancer self-help (care level 1), psychosocial cancer counselling (care level 2) and psycho-oncological psychotherapy (care level 3) in a uniform care concept, operationalize them and integrate them into oncological care. It will provide a care management to regulate interdisciplinary and cross-sectoral cooperation in health care. Results of the process and outcome evaluation will provide insight into the quality and appropriateness of the care concept as well as the implementation process of a complex health innovation. In the long-term, the program should ensure care of cancer patients from diagnosis to cure or palliative care and combine psychosocial and psychological care with further integrative oncology approaches,

1  
2  
3 such as music and art therapy. In addition, the program could also be suitable for the care of  
4 patients other than those suffering from oncological diseases.  
5

6  
7 A particular strength of the study is the participation of several statutory health insurance funds  
8 and a possible linkage of primary and secondary data. For the first time in Germany, this study  
9 thus offers an evidence-based basis for decision-making on the integration of a new demand-  
10 oriented psycho-oncological care structure into standard health care.  
11  
12  
13

### 14 15 **Contribution**

16  
17 Mr. Hallek, Mr. Kusch, Mr. Hellmich, Mr. Gerlach, Mr. Pfaff, Mrs. Scholten, Mr. Haas and Mrs.  
18 Stock are applicants of the funded study. Mrs. Jenniches, Mrs. Dresen, Mrs. Scholten, Mr.  
19 Cwik, Mrs. Lemmen, Mr. Hellmich, Mrs. Samel, Mrs. Labouvie and Mr. Kusch designed the  
20 study. Mrs. Jenniches drafted manuscript and incorporated the revisions between authors. Mr.  
21 Hellmich, Mrs. Hagemeyer, Mrs. Samel, Mrs. Jenniches and Mrs. Dresen drafted and finalized  
22 the concept of data protection for all patient related research data and data transfers involved  
23 as part of the ethics application. The final manuscript has been critically revised and approved  
24 by all authors.  
25  
26  
27  
28  
29  
30  
31

### 32 **Funding statement**

33  
34 This study is funded by the Innovation Fund of the Federal Joint Committee, the G-BA  
35 (01NVF17022). The study has passed a peer-review selection process.  
36  
37  
38  
39

### 40 **Competing interests**

41  
42 The authors declare no conflicts of interest.  
43  
44  
45  
46  
47  
48  
49  
50  
51  
52  
53  
54  
55  
56  
57  
58  
59  
60



## REFERENCES

- 1 Torre LA, Bray F, Siegel RL, et al. Global cancer statistics, 2012. *CA Cancer J Clin* 2015;65(2):87–108.
- 2 Robert-Koch-Institut. Zentrum für Krebsregisterdaten. Krebs in Deutschland für 2013/2014 2017(11. Ausgabe).  
[https://www.krebsdaten.de/Krebs/DE/Content/Publikationen/Krebs\\_in\\_Deutschland/kid\\_2017/krebs\\_in\\_deutschland\\_2017.pdf;jsessionid=F2403ECE5FDAC900A7D8783650BDCAF8.1\\_cid390?\\_\\_blob=publicationFile](https://www.krebsdaten.de/Krebs/DE/Content/Publikationen/Krebs_in_Deutschland/kid_2017/krebs_in_deutschland_2017.pdf;jsessionid=F2403ECE5FDAC900A7D8783650BDCAF8.1_cid390?__blob=publicationFile).
- 3 Linden W, Vodermaier A, Mackenzie R, et al. Anxiety and depression after cancer diagnosis: prevalence rates by cancer type, gender, and age. *J Affect Disord*. 2012;141(2-3):343–51.
- 4 Zabora J, BrintzenhofeSzoc K, Curbow B, et al. The prevalence of psychological distress by cancer site. *Psychooncology* 2001;10(19-28).
- 5 Bussmann S, Vaganian L, Kusch M, et al. Angst und Emotionsregulation bei Krebspatienten. *Psychotherapeut* 2018;63(3):194-203.
- 6 Holland JC, ed. *Psycho-oncology*, 3rd edn. New York: Oxford University Press 2015.
- 7 Kusch M, Labouvie H, Hein-Nau B. *Klinische Psychoonkologie*. Berlin/Heidelberg: Springer 2013.
- 8 Weis J, Schumacher A, Blettner G, et al. Psychoonkologie. *Onkologe* 2007;13(2):185–94.
- 9 Bundesministerium für Gesundheit (BMG). Nationaler Krebsplan: Handlungsfelder, Ziele, Umsetzungsempfehlungen und Ergebnisse 2012.  
[https://www.bundesgesundheitsministerium.de/fileadmin/Dateien/5\\_Publikationen/Praevencion/Broschueren/Broschuere\\_Nationaler\\_Krebsplan.pdf](https://www.bundesgesundheitsministerium.de/fileadmin/Dateien/5_Publikationen/Praevencion/Broschueren/Broschuere_Nationaler_Krebsplan.pdf).
- 10 Institute of Medicine (IOM). *Cancer care for the whole patient: Meeting psychosocial health needs*. Washington, DC: National Academies Press 2008.
- 11 Leitlinienprogramm Onkologie (DKG, DKH, AWMF). *Psychoonkologische Diagnostik, Beratung und Behandlung von erwachsenen Krebspatienten: Langfassung Version 1.1* 2014.
- 12 Holland JC, Watson M, Dunn J. The IPOS new international Standard of Quality Cancer Care: integrating the psychosocial domain into routine care. *Psychooncology* 2011;20(7):677–80.
- 13 Jacobsen PB, Lee M. Integrating Psychosocial Care Into Routine Cancer Care. *Cancer Control* 2015;22(4):442–49.
- 14 Singer S, Dieng S, Wesselmann S. Psycho-oncological care in certified cancer centres - a nationwide analysis in Germany. *Psychooncology* 2013;22(6):1435–37.
- 15 Singer S, Hornemann B, Bruns G, et al. Organisation der psychoonkologischen Versorgung. *Forum* 2016;31(2):124–29.
- 16 Heckl U, Singer S, Wickert M, et al. Aktuelle Versorgungsstrukturen in der Psychoonkologie. *Nervenheilkunde* 2011;30(03):124–30.
- 17 Faller H, Schuler M, Richard M, et al. Effects of psycho-oncologic interventions on emotional distress and quality of life in adult patients with cancer: Systematic review and meta-analysis. *J Clin Oncol* 2013;31(6):782–93.
- 18 Osborn RL, Demoncada AC, Feuerstein M. Psychosocial interventions for depression, anxiety, and quality of life in cancer survivors: meta-analyses. *Int J Psychiatry Med* 2006;36(1):13–34.

- 19 Sheard T, Maguire P. The effect of psychological interventions on anxiety and depression in cancer patients: results of two meta-analyses. *Br J Cancer* 1999;80(11):1170–80.
- 20 Zimmermann T, Heinrichs N, Baucom DH. "Does one size fit all?" moderators in psychosocial interventions for breast cancer patients: a meta-analysis. *Ann Behav Med* 2007;34(3):225–39.
- 21 Kerr A, Ross E, Jacques G, et al. The sociology of cancer: A decade of research. *Sociol Health Illn* 2018;40(3):552–76.
- 22 Ibbotson T, Maguire P, Selby P, et al. Screening for anxiety and depression in cancer patients: The effects of disease and treatment. *Eur J Cancer* 1994;30A(1):37–40.
- 23 Jacobsen PB, Donovan KA, Trask PC, et al. Screening for psychologic distress in ambulatory cancer patients. *Cancer* 2005;103(7):1494–502.
- 24 Kusch M, Cwik JC, Bussmann S, et al. Fragebogen zur kognitiv-emotionalen Auseinandersetzung mit Krebs (KEA-K). *Köln: CIO Köln* 2017.
- 25 Cwik JC, Bussmann S, Vaganian L, et al. Fragebogen zu Psychosozialen Risiken (PSR). *Köln: Universität zu Köln* 2018.
- 26 Oakley A, Strange V, Bonell C, et al. Process evaluation in randomised controlled trials of complex interventions. *BMJ* 2006;332(7538):413–16.
- 27 Proctor E, Silmere H, Raghavan R, et al. Outcomes for implementation research: Conceptual distinctions, measurement challenges, and research agenda. *Adm Policy Ment Health* 2011;38(2):65–76.
- 28 Moore GF, Audrey S, Barker M, et al. Process evaluation of complex interventions: Medical Research Council guidance. *BMJ* 2015;350:h1258.
- 29 Damschroder LJ, Aron DC, Keith RE, et al. Fostering implementation of health services research findings into practice: A consolidated framework for advancing implementation science. *Implement Sci* 2009;4:50.
- 30 Craig P, Dieppe P, Macintyre S, et al. Developing and evaluating complex interventions: The new Medical Research Council guidance. *BMJ* 2008;337:a1655.
- 31 Damschroder LJ, Lowery JC. Evaluation of a large-scale weight management program using the consolidated framework for implementation research (CFIR). *Implement Sci* 2013;8:51.
- 32 Liang S, Kegler MC, Cotter M, et al. Integrating evidence-based practices for increasing cancer screenings in safety net health systems: a multiple case study using the Consolidated Framework for Implementation Research. *Implement Sci* 2016;11:109.
- 33 Venkataramani AS, Bor J, Jena AB. Regression discontinuity designs in healthcare research. *BMJ* 2016;352:i1216.
- 34 Moscoe E, Bor J, Bärnighausen T. Regression discontinuity designs are underutilized in medicine, epidemiology, and public health: A review of current and best practice. *J Clin Epidemiol* 2015;68(2):122–33.
- 35 Maas IL, Nolte S, Walter OB, et al. The regression discontinuity design showed to be a valid alternative to a randomized controlled trial for estimating treatment effects. *J Clin Epidemiol* 2017;82:94–102.
- 36 Issel LM. Health program planning and evaluation: A practical, systematic approach for community health, 3rd edn. Burlington Mass.: Jones and Bartlett Learning 2014.
- 37 Tuffaha H, El-Saifi N, Chambers S, et al. New challenges in psycho-oncology: Economic evaluation of psychosocial services in cancer: Challenges and best practice recommendations. *Psychooncology* 2019(28):3–10.

- 1  
2  
3 38 Brazier J, Ratcliffe J, Salomon JA, et al. Measuring and valuing health benefits for  
4 economic evaluation, 2nd edn. New York, Oxford: Oxford Univ. Pr 2017.  
5  
6 39 Patton MQ. Qualitative research and evaluation methods, 3rd edn. Thousand Oaks:  
7 Sage 2002.  
8  
9 40 Palinkas LA, Horwitz SM, Green CA, et al. Purposeful Sampling for Qualitative Data  
10 Collection and Analysis in Mixed Method Implementation Research. *Adm Policy Ment*  
11 *Health* 2015;42(5):533–44.  
12  
13 41 Creswell JW, Plano Clark VL. Designing and conducting mixed methods research. Los  
14 Angeles, London, New Delhi, Singapore, Washington DC, Melbourne: Sage 2018.  
15  
16 42 Dillman DA. Mail and telephone surveys: the total design method. New York: Wiley &  
17 Sons 1978.  
18  
19 43 Mayring P. Qualitative Inhaltsanalyse: Grundlagen und Techniken, 12th edn. Weinheim:  
20 Beltz 2015.  
21  
22 44 Bohnsack R. Gruppendiskussionsverfahren und dokumentarische Methode. In:  
23 Schaeffer D, Müller-Mundt G, eds. Qualitative Gesundheits- und Pflegeforschung. Bern:  
24 Huber 2002:305–25.  
25  
26 45 Swart E, Gothe H, Geyer S, et al. Gute Praxis Sekundärdatenanalyse (GPS): Leitlinien  
27 und Empfehlungen. *Gesundheitswesen* 2015;77(2):120–26.  
28  
29 46 Ansmann L, Kuhr K, Kowalski C. Mehrebenenanalysen in der organisationsbezogenen  
30 Versorgungsforschung – Nutzen, Voraussetzungen und Durchführung.  
31 *Gesundheitswesen* 2017;79(3):203–09.  
32  
33 47 Austin PC. An Introduction to Propensity Score Methods for Reducing the Effects of  
34 Confounding in Observational Studies. *Multivariate Behav Res* 2011;46(3):399–424.  
35  
36 48 Austin PC. Optimal caliper widths for propensity-score matching when estimating  
37 differences in means and differences in proportions in observational studies. *Pharm*  
38 *Stat* 2011;10(2):150–61.  
39  
40 49 Rosenbaum PR, Rubin DB. Constructing a Control Group Using Multivariate Matched  
41 Sampling Methods That Incorporate the Propensity Score. *The American Statistician*  
42 2012;39(1):33–38.  
43  
44  
45  
46  
47  
48  
49  
50  
51  
52  
53  
54  
55  
56  
57  
58  
59  
60
